# Supplementary material for: Identification of atrial fibrillation associated genes and functional non-coding variants
Source: PubMed Central journal article supplement (PMC6802215; doi:10.1038/s41467-019-12721-5), 2019-10-18
Supplement: 41467_2019_12721_MOESM2_ESM.pdf [file 41467_2019_12721_MOESM2_ESM.pdf]

*Identification of atrial fibrillation associated genes and  
functional non-coding variants*

Van Ouwerkerk et al.

**Supplementary Information**

# Supplementary Figure 1

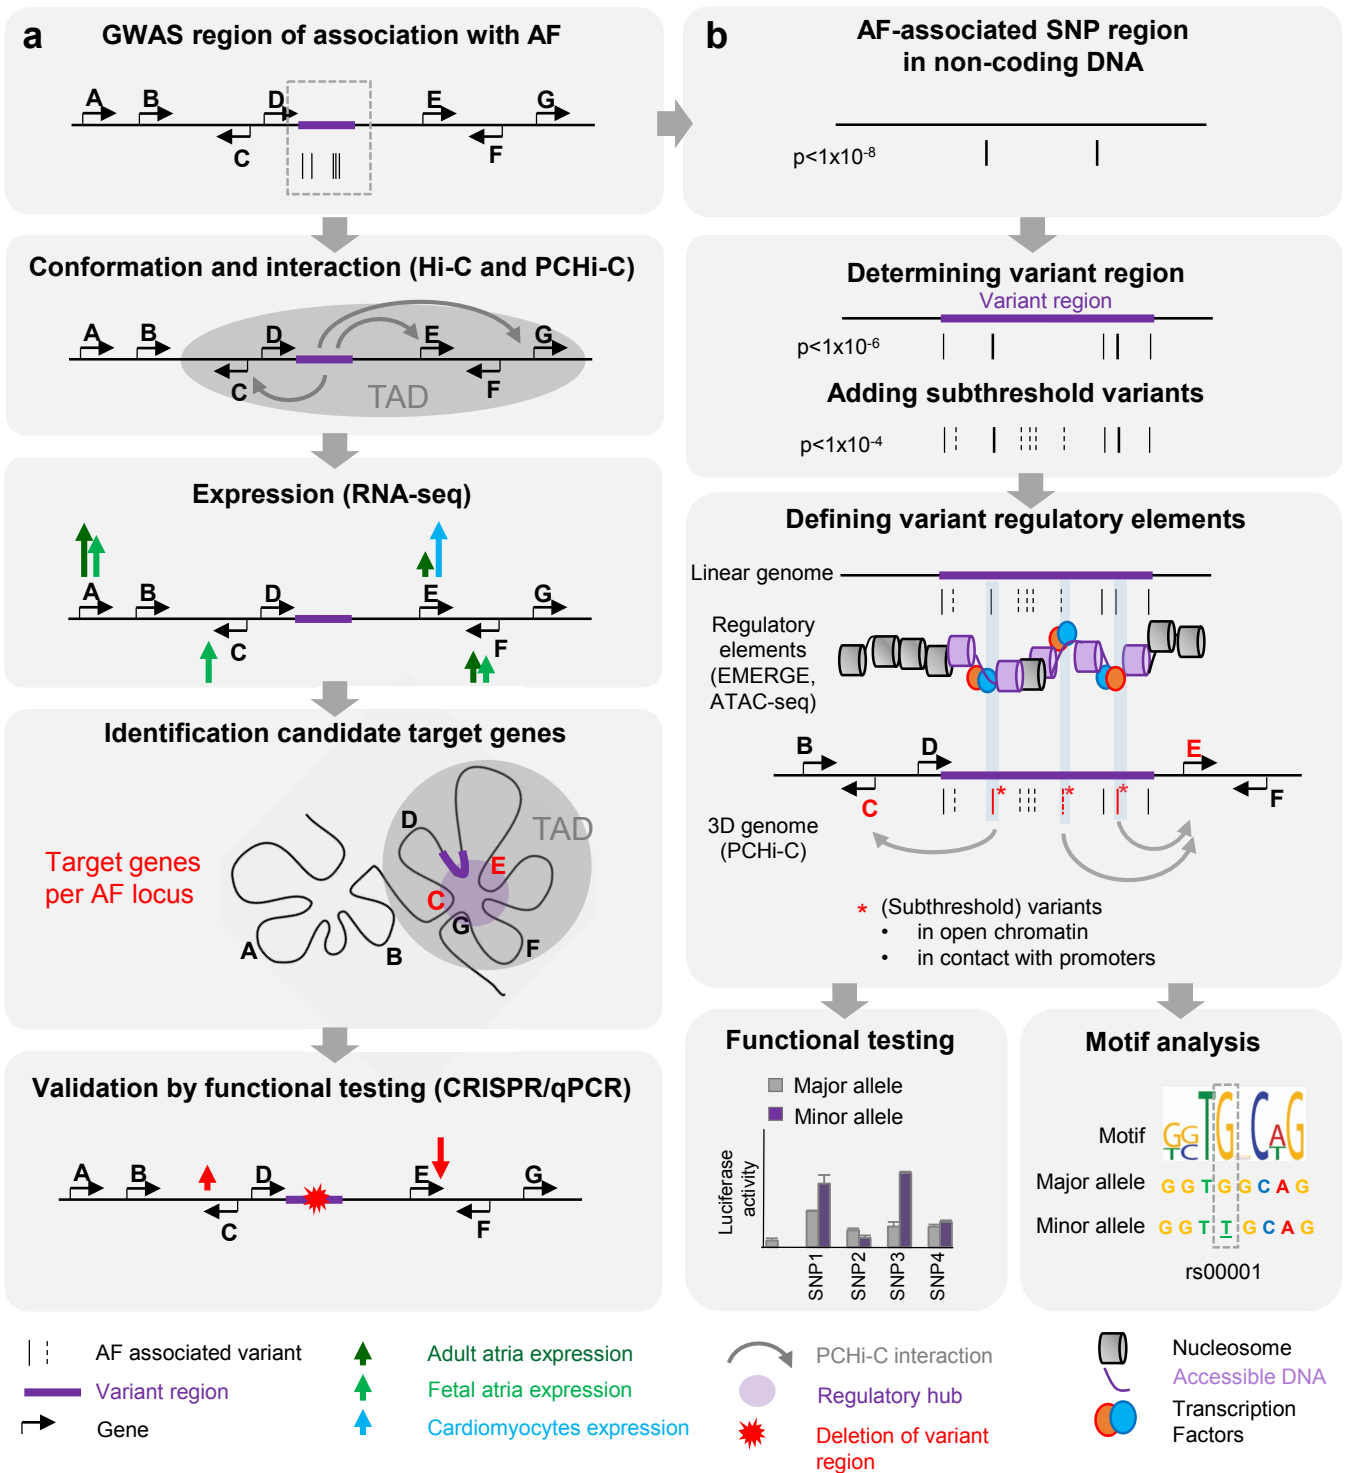

## Supplementary Figure 1. Flowchart approach

**a) GWAS to target genes.** GWAS regions were plotted (top panel) to determine which genes lie within the locus TAD using Hi-C and PCHI-C, and expression of these genes was determined using several RNA-seq datasets. Combining this data, we determined likely candidate genes per AF locus. Furthermore, we validated the candidate genes by *in vivo* deletion of the LD block using CRISPR. **b) GWAS to functional variants.** Variant regions (VRs) were defined as first to last genome-wide significant variant per region. Subthreshold variants in the VRs were included to identify functional variants that lie in regions with epigenetics marks (EMERGE) or accessible DNA (ATAC-seq). Target genes of functional variants were identified using PCHI-C. Moreover, on the functional variants we performed motif analysis to identify variants that allele-specifically alter TF-binding sites. The approach was validated by functional testing. Abbreviations: Genome Wide Association Study (GWAS), Linkage Disequilibrium (LD), Promoter Capture Hi-C (PCHI-C), Atrial Fibrillation (AF), Topologically Associated Domain (TAD), Transcription Factor (TF).

## Supplementary Figure 2

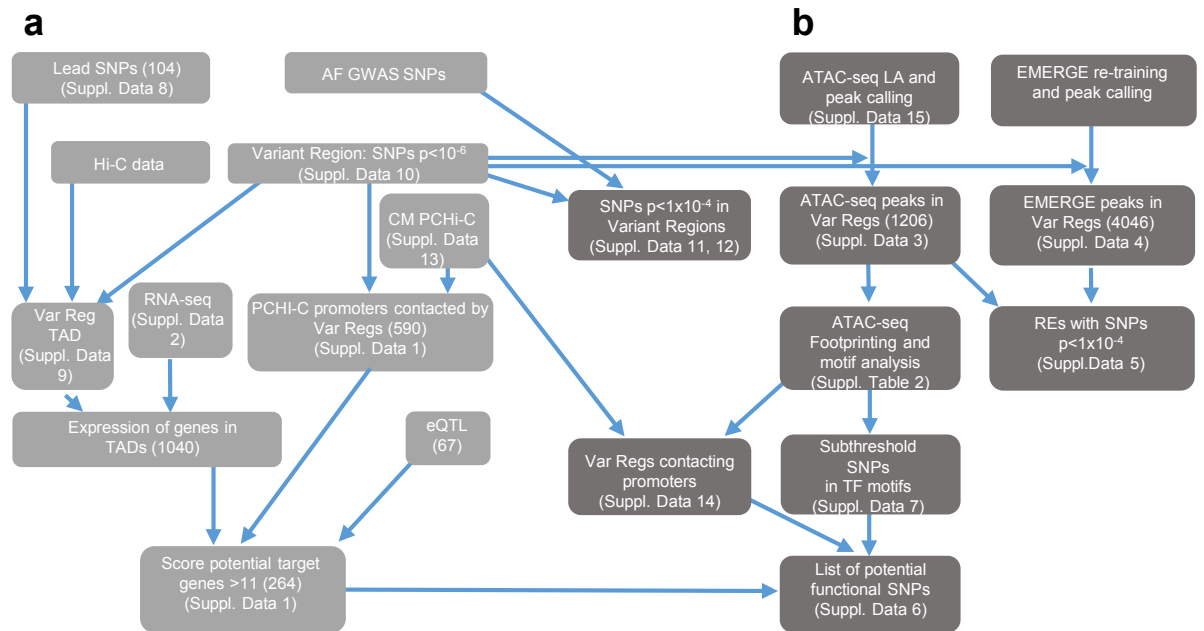

### Supplementary Figure 2. Flowchart bioinformatics approach

Flowchart of bioinformatics approach showing datasets used, reference to supplementary tables and data (results in brackets) of **a**) target gene identification, and **b**) variant regulatory element identification.

### Supplementary Fig. 3. Variant regions as determined by different p-value cutoffs and LD analysis

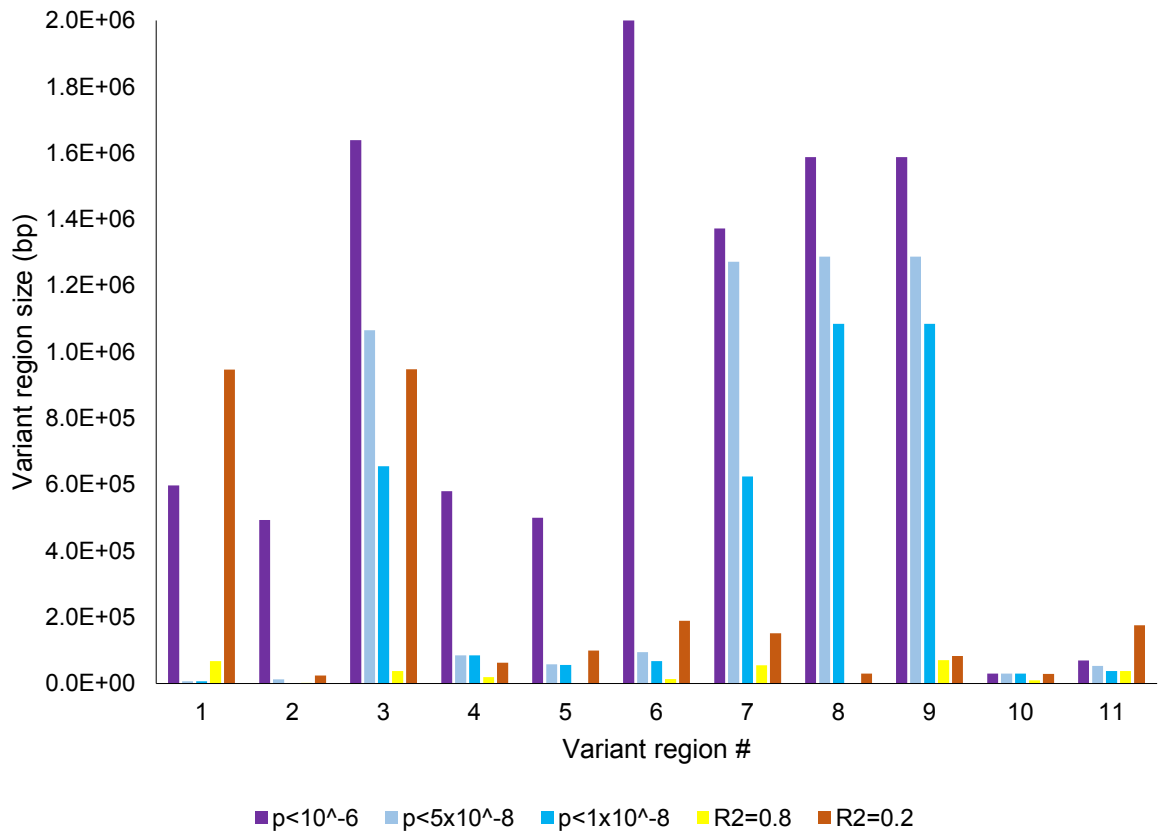

### Supplementary Figure 3. Variant regions as determined by different p-value cutoffs and LD analysis

Variant region sizes as determined by GWAS p-value cut-offs as well as stringent (R<sup>2</sup>=0.8) and lenient (R<sup>2</sup>=0.2) LD around the sentinel SNP.

# Supplementary Fig. 4. Normalized expression and PCHI-C data

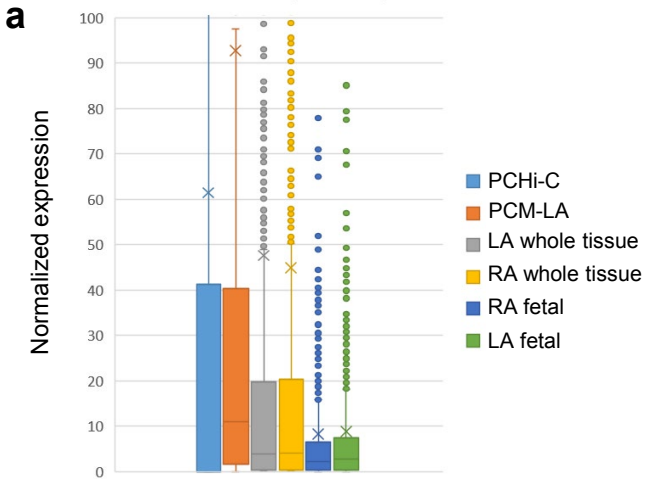

**b**

| Dataset               | No Expression (0) | Expression (1) | High expression (2) |
|-----------------------|-------------------|----------------|---------------------|
| PCHI-C                | 0 <> 0 tags       | >0 tags        | -                   |
| LA-PCM                | 0 <> 10 tags      | 10 <> 40 tags  | >40 tags            |
| LA whole tissue adult | 0 <> 4 tags       | 4 <> 20 tags   | >20 tags            |
| RA whole tissue adult | 0 <> 3 tags       | 3 <> 20 tags   | >20 tags            |
| RA fetal              | 0 <> 3 tags       | 3 <> 8 tags    | >8 tags             |
| LA fetal              | 0 <> 3 tags       | 3 <> 8 tags    | >8 tags             |

## Supplementary Figure 4. Normalized expression and PCHI-C data

**a)** Boxplot showing normalized counts and spread of counts per genome-wide dataset (five RNA-seq, one PCHI-C). **b)** Boundaries per expression category used for the scoring of potential target genes.

# Supplementary Fig. 5

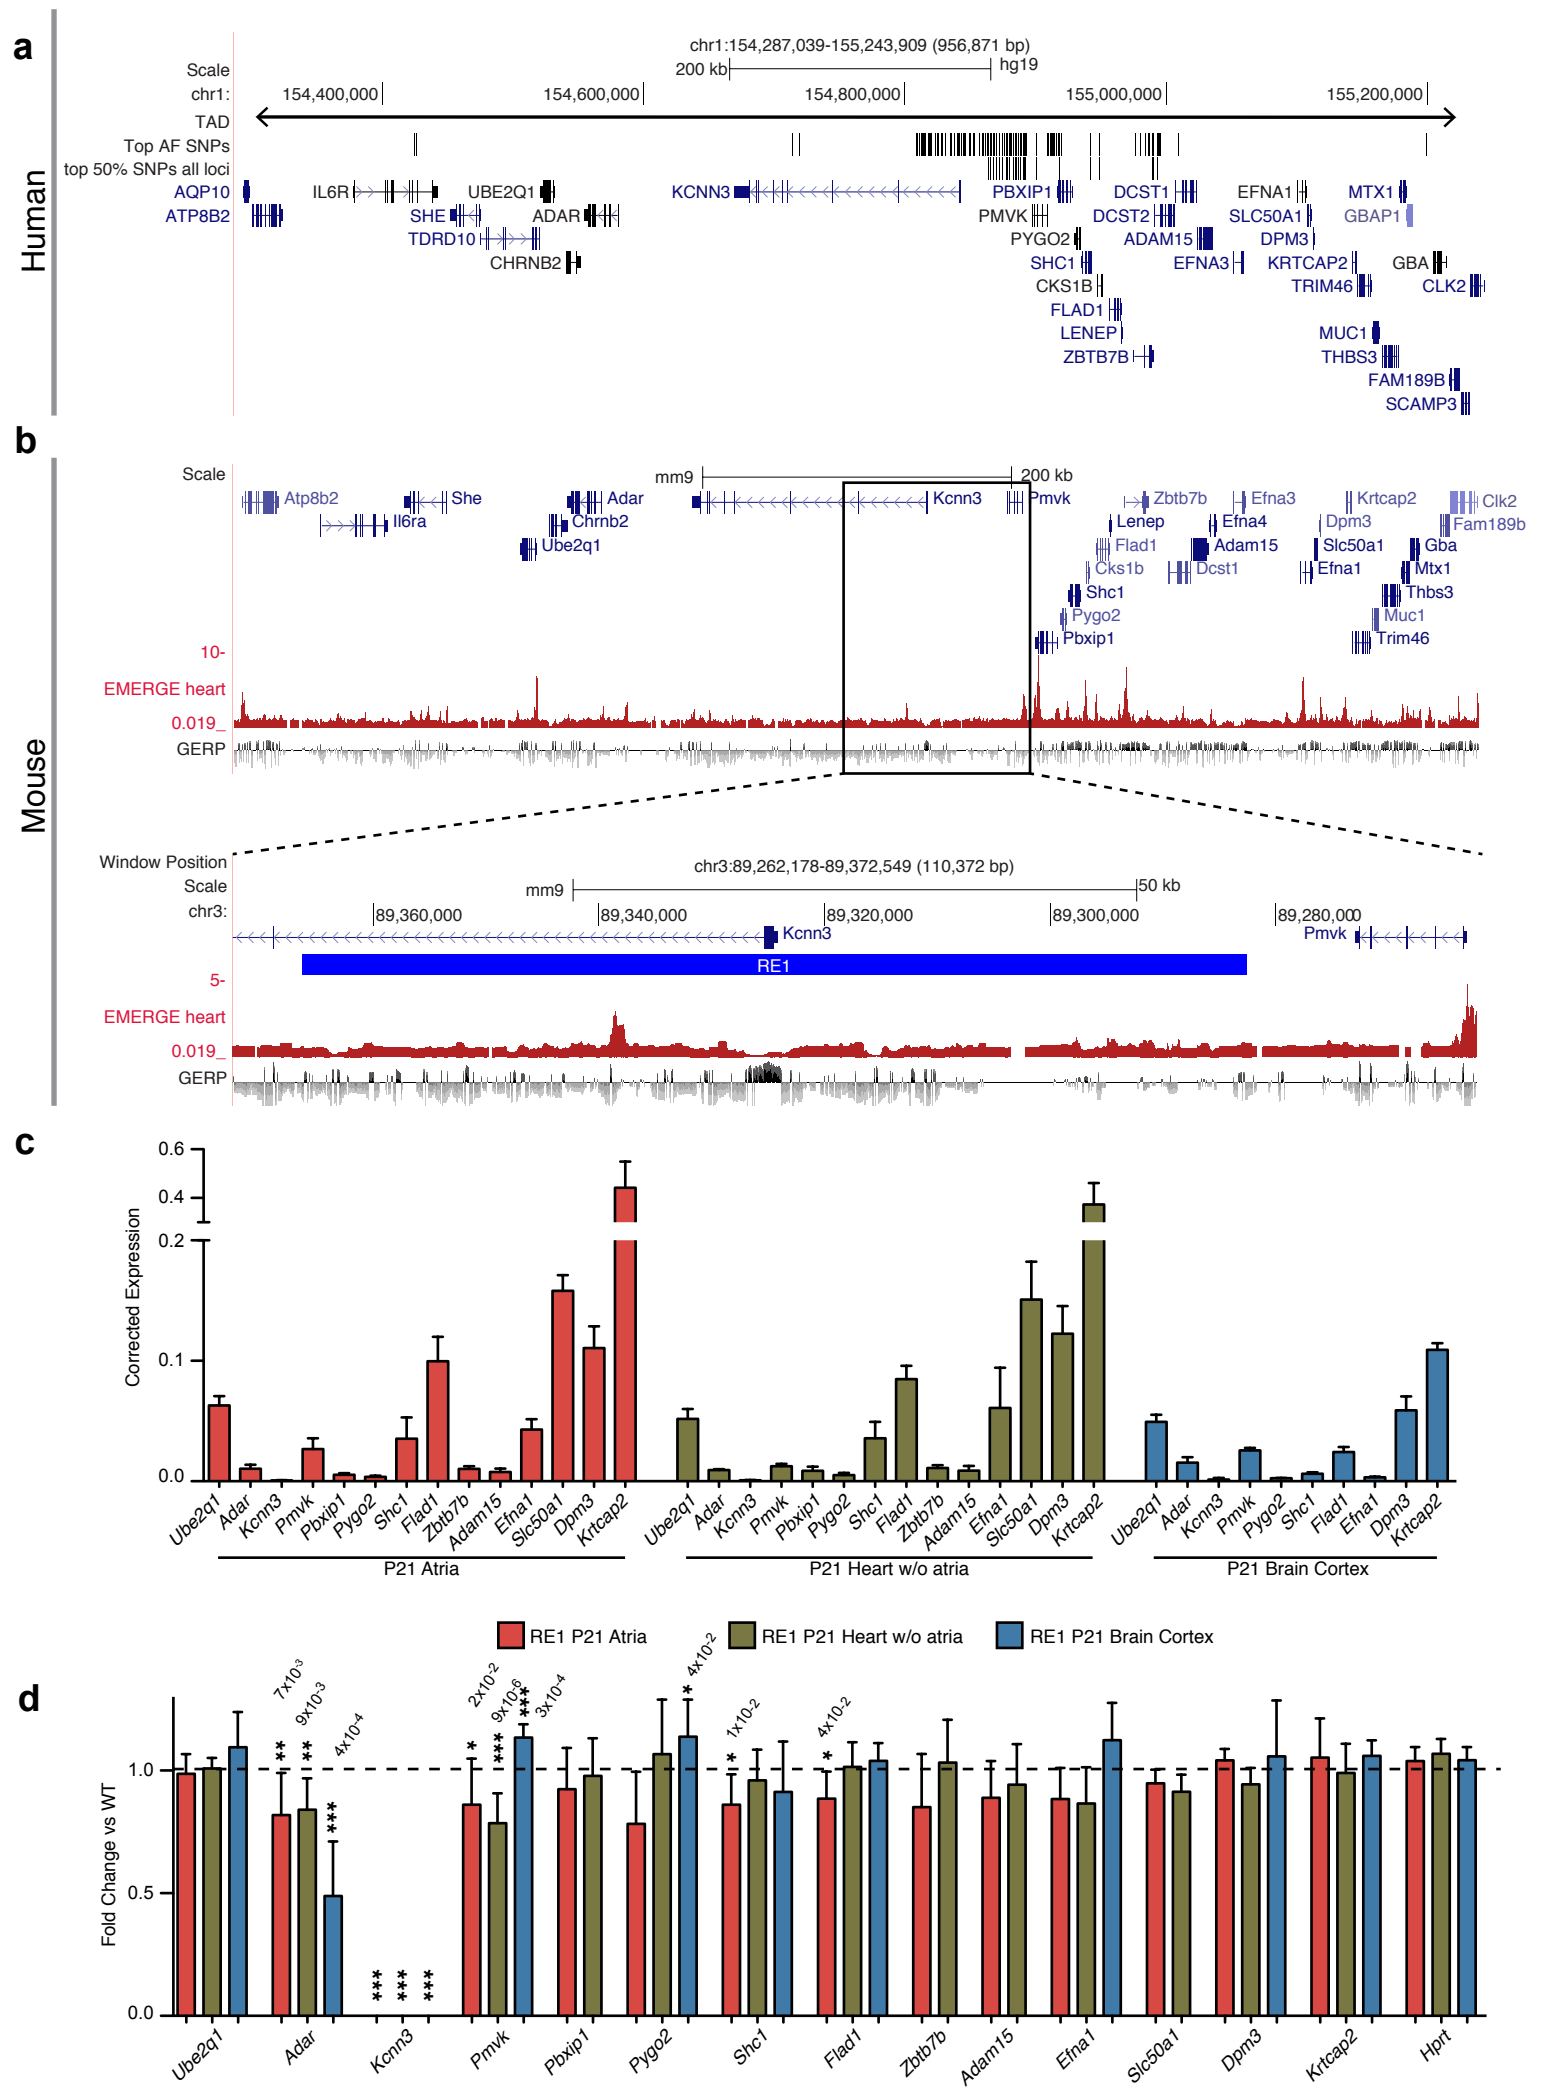

**Supplementary Figure 5. Absence of an AF variant region in the 1q21 locus (*Kcnn3*) leads decreased expression within the TAD.**

**a)** Human 1q21 locus (*KCNN3*) showing top SNPs. **b)** Homologous region in the mouse (3qF1) with EMERGE enhancer prediction track (top) and zoom in to show the 85Mb deletion RE1 with conservation track. **c)** Wild-type expression of candidate affected genes in the TAD in P21 left and right atria and heart without atria. N=8 wildtype, n=9 homozygotes for all tissues. Source data are provided as Source Data file. **d)** Expression fold change of *Kcnn3*<sup>RE1/RE1</sup> vs wild-type littermates with *Hprt* as a negative control. Error bars represent SD, \* is p<0.05, \*\* is p<0.01, and \*\*\* is p<0.001. Source data are provided as Source Data file.

# Supplementary Fig. 6

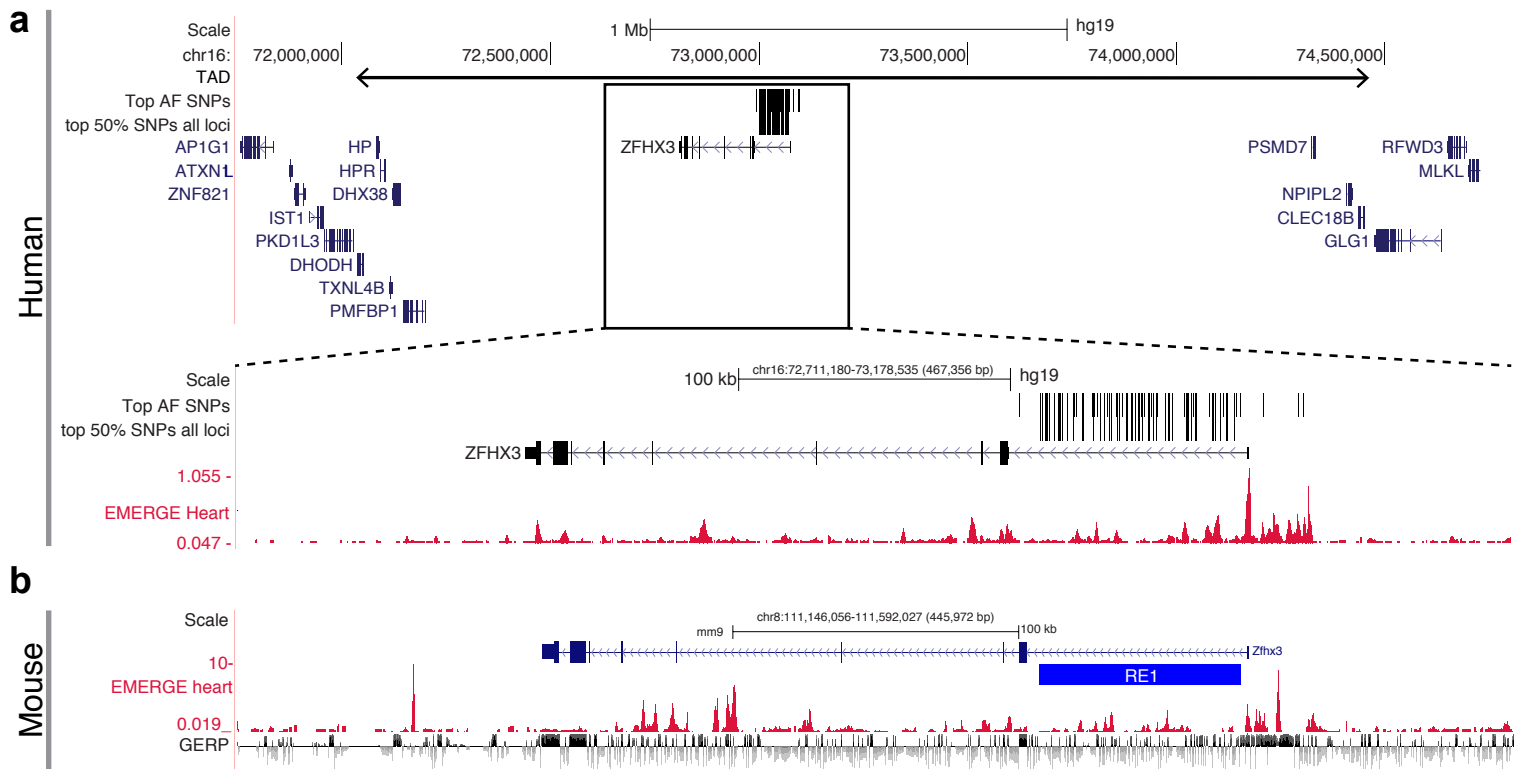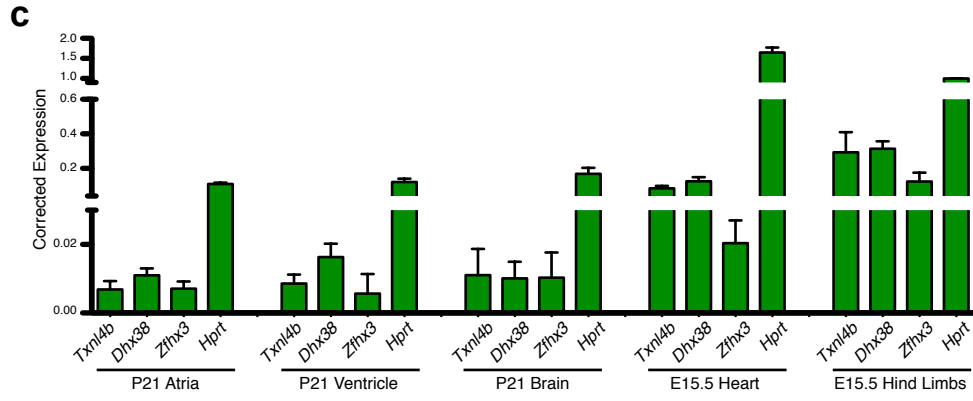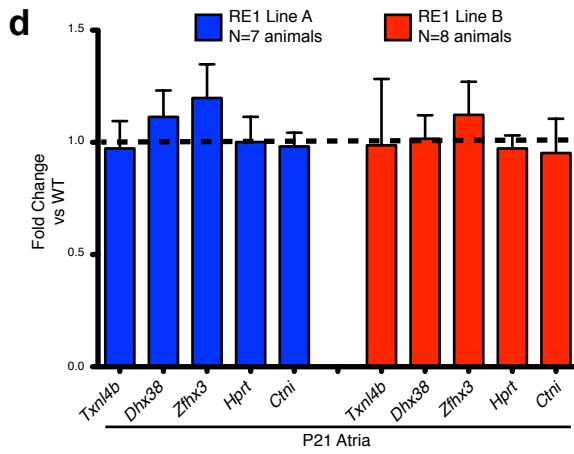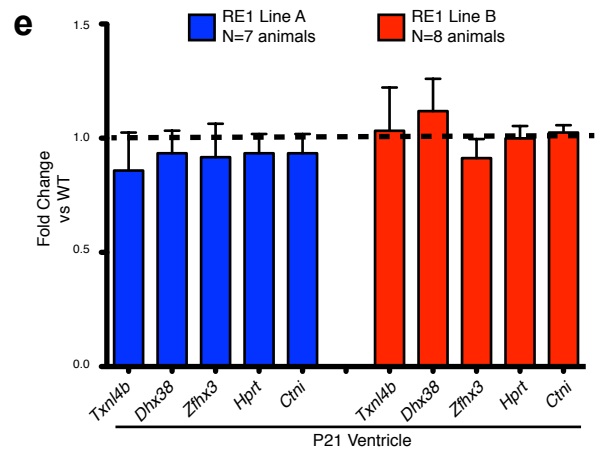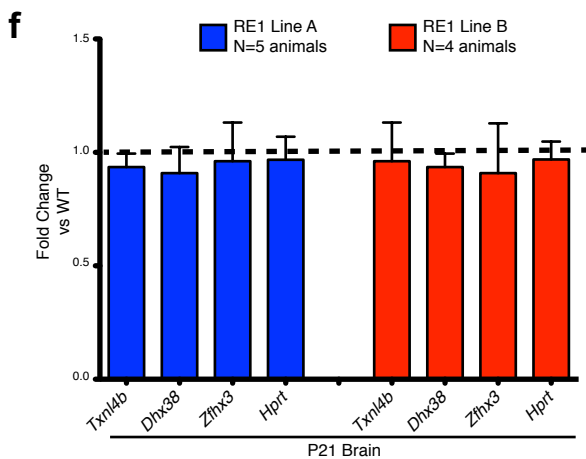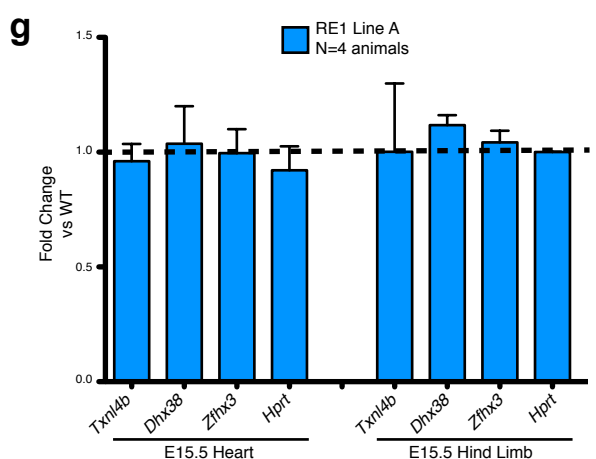



**Supplementary Figure 6. 33Mb region deletion in the first intron of *Zfhx3* has no effect in candidate gene expression.**

**a)** Human 16q22 locus showing SNPs and EMERGE track. **b)** Homologous region in the mouse showing the 33Mb deletion in the first intron on *Zfhx3*. **c)** Wild-type corrected expression of candidate genes in the TAD of P21 left and right atria, ventricles, and brain, and E15.5 whole hearts and hind limbs. **d)** Expression fold change of two independent *Zfhx3*<sup>RE1/RE1</sup> mouse lines vs wild-type littermates of P21 atria, **e)** P21 ventricles, **f)** P21 brain, and **g)** E15.5 whole hearts and hind limbs of line A only. Error bars represent standard deviation (SD), p-values determined using two-tailed Student's t-test. Source data of panels c-g are provided as Source Data files.

# Supplementary Fig. 7

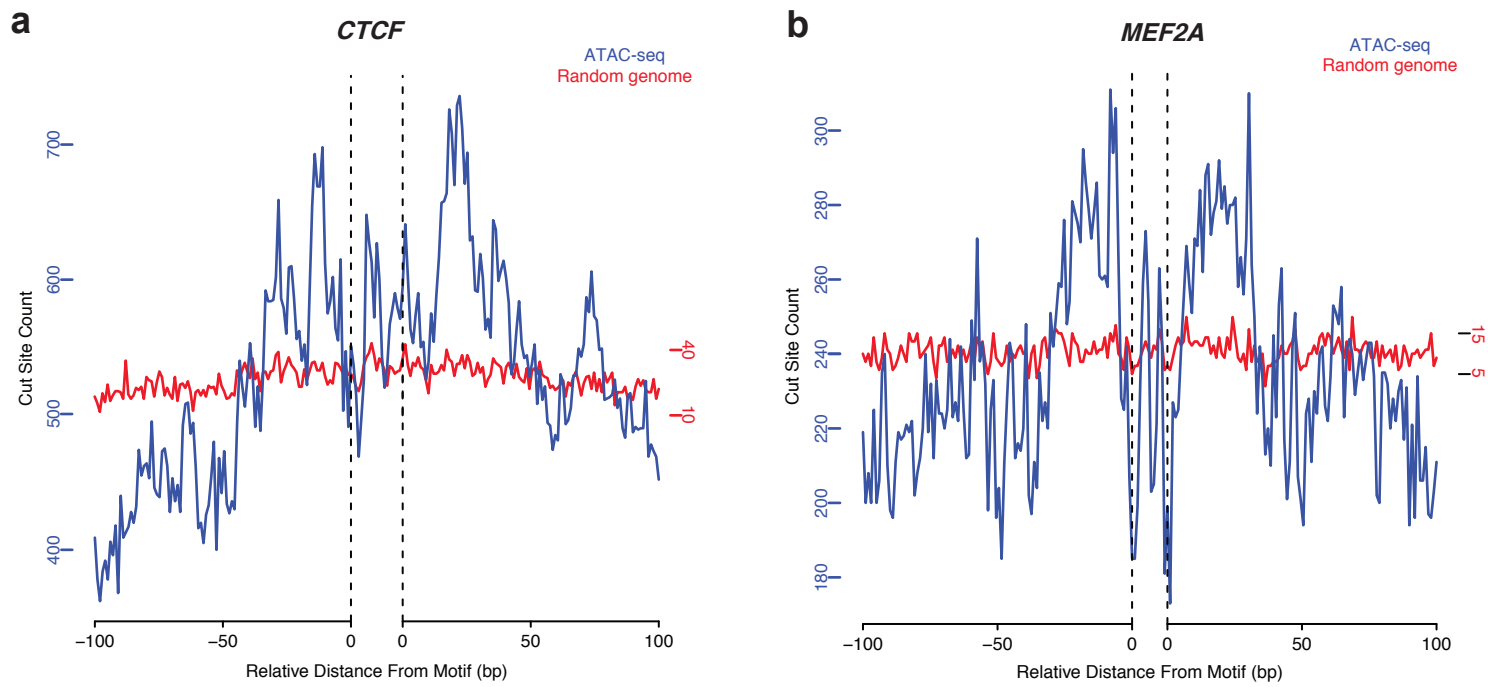

**Supplementary Figure 7. ATAC-seq footprinting of *CTCF* and *MEF2A*.**

**a)** The footprint of *CTCF* and **b)** *MEF2A* in ATAC-seq compared to random genome.

## Supplementary Fig. 8

**a**

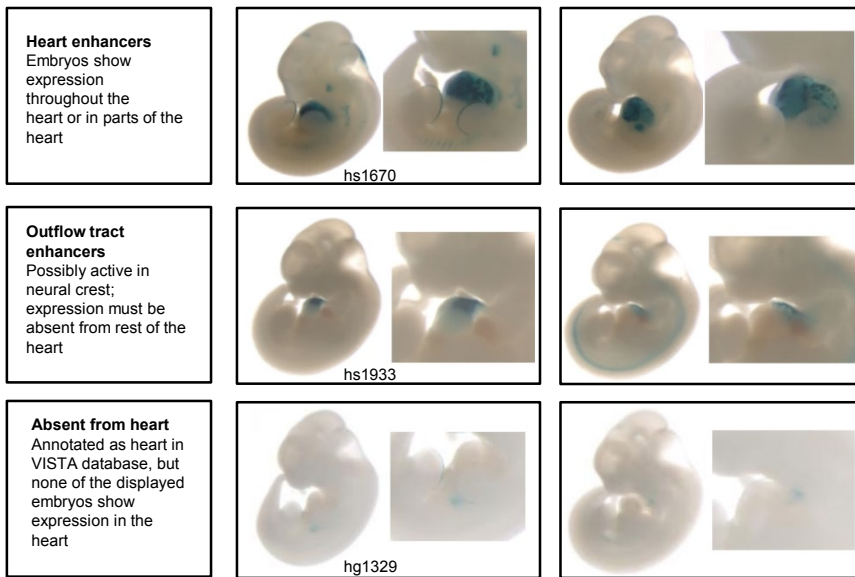

**b**

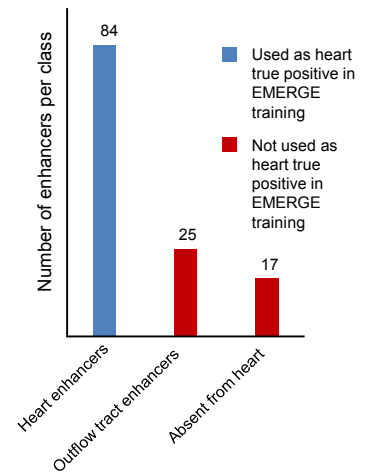

### Supplementary Figure 8. Curation of validated heart enhancers prior to heart enhancer prediction.

**a)** The annotation criteria per activity class are given, as well as a representative example of each class. The image of the enhancer screened transgenic embryos are taken from the Vista enhancer browser <sup>73</sup>. **b)** The number of enhancers that were found per class and which class was used as true positive training data for subsequent heart enhancer prediction.

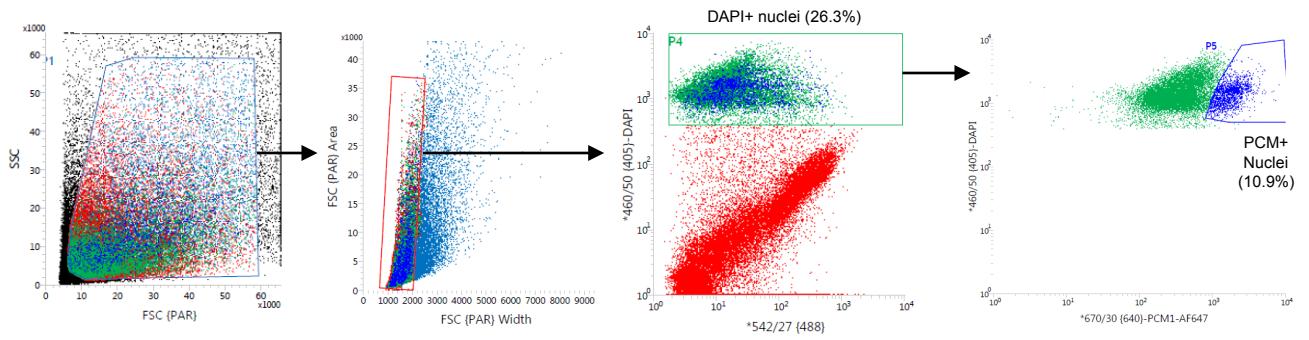

**Supplementary Figure 9. FACS gating strategy for sorting PCM1<sup>+</sup>/DAPI<sup>+</sup> nuclei of left atria**

Gating strategy to isolate intact viable nuclei that are DAPI and PCM1 positive for RNA-seq presented in Fig. 1d,e, Fig. 3a,e, Fig. 4b and Fig. 5d.

Supplementary Table 1: Summary of (epi)genetic data per AF-associated locus

| VR#     | sentinel SNP | chr   | length variant region ( $p < 10^{-6}$ ) (bp) | length variant region ( $p < 5 \times 10^{-8}$ ) (bp) | length variant region ( $p < 1 \times 10^{-8}$ ) (bp) | TAD length (bp) | genes in TAD | genes contacted by variant region | ATAC-seq peaks | EMERGE peaks |
|---------|--------------|-------|----------------------------------------------|-------------------------------------------------------|-------------------------------------------------------|-----------------|--------------|-----------------------------------|----------------|--------------|
| 1       | rs187585530  | chr1  | 6160                                         | 6160                                                  | 6160                                                  | 6160            | 597299       | 13                                | 2              | 1            |
| 2       | rs880315     | chr1  | 11951                                        | 11951                                                 | 319                                                   | 493010          | 13           | 2                                 | 2              | 7            |
| 3       | rs146518726  | chr1  | 1177831                                      | 1065803                                               | 655450                                                | 1639190         | 9            | 9                                 | 12             | 25           |
| 4       | rs1443926    | chr1  | 92003                                        | 84978                                                 | 84978                                                 | 580500          | 1            | 0                                 | 12             | 4            |
| 5       | rs4484922    | chr1  | 76421                                        | 57803                                                 | 56130                                                 | 499875          | 4            | 2                                 | 8              | 12           |
| 6       | rs79187193   | chr1  | 161041                                       | 94584                                                 | 67261                                                 | 3632299         | 10           | 4                                 | 14             | 19           |
| 7       | rs11264280   | chr1  | 701723                                       | 1272754                                               | 624890                                                | 878812          | 28           | 37                                | 39             | 62           |
| 8       | rs72700114   | chr1  | 1086897                                      | 1287590                                               | 1084665                                               | 1587911         | 12           | 6                                 | 32             | 40           |
| 9       | rs503706     | chr1  | 1086897                                      | 1287590                                               | 1084665                                               | 1587911         | 14           | 6                                 | 32             | 40           |
| 10      | rs4590732    | chr1  | 30192                                        | 30192                                                 | 30192                                                 | 233813          | 7            | 11                                | 2              | 14           |
| 11      | rs4951261    | chr1  | 68897                                        | 52589                                                 | 37606                                                 | 1034665         | 11           | 6                                 | 3              | 6            |
| 12      | rs7919685    | chr10 | 500205                                       | 525326                                                | 496009                                                | 862687          | 4            | 3                                 | 9              | 15           |
| 13      | rs6480708    | chr10 | 689834                                       | 292503                                                | 267052                                                | 889010          | 23           | 15                                | 29             | 42           |
| 14      | rs11001667   | chr10 | 73303                                        | 54109                                                 | 54109                                                 | 1826157         | 6            | 1                                 | 1              | 1            |
| 15      | rs1044258    | chr10 | 726740                                       | 434201                                                | 246797                                                | 1124992         | 28           | 36                                | 32             | 40           |
| 16      | rs11598047   | chr10 | 713418                                       | 471102                                                | 471102                                                | 1571804         | 29           | 35                                | 47             | 100          |
| 17      | rs1822273    | chr11 | 37510                                        | 31775                                                 | 31775                                                 | 197531          | 1            | 1                                 | 4              | 6            |
| 18      | rs949078     | chr11 | 88494                                        | 88494                                                 | 88494                                                 | 915093          | 4            | 0                                 | 2              | 2            |
| 19      | rs76097649   | chr11 | 32687                                        | 32687                                                 | 30183                                                 | 1338375         | 8            | 1                                 | 6              | 8            |
| 20      | rs10842383   | chr12 | 204179                                       | 152642                                                | 120980                                                | 2172009         | 3            | 0                                 | 3              | 1            |
| 21      | rs113819537  | chr12 | 54940                                        | 2903                                                  | 2903                                                  | 661125          | 4            | 0                                 | 3              | 2            |
| 22      | rs12809354   | chr12 | 86012                                        | 86012                                                 | 86012                                                 | 11639132        | 6            | 2                                 | 8              | 24           |
| 23      | rs7978685    | chr12 | 188091                                       | 186910                                                | 175444                                                | 709499          | 19           | 22                                | 9              | 12           |
| 24      | rs35349325   | chr12 | 243219                                       | 230810                                                | 230798                                                | 1632656         | 13           | 10                                | 16             | 17           |
| 25      | rs11180703   | chr12 | 40744                                        | 40744                                                 | 33724                                                 | 1386750         | 6            | 1                                 | 1              | 1            |
| 26      | rs883079     | chr12 | 408514                                       | 388254                                                | 103957                                                | 600657          | 4            | 2                                 | 21             | 13           |
| 27      | rs12810346   | chr12 | 463943                                       | 290723                                                | 17119                                                 | 1435125         | 4            | 2                                 | 6              | 9            |
| 28      | rs12298484   | chr12 | 96070                                        | 95773                                                 | 78487                                                 | 580977          | 4            | 9                                 | 7              | 12           |
| 29      | rs9580438    | chr13 | 688391                                       | 63560                                                 | 53223                                                 | 1793906         | 1            | 1                                 | 4              | 6            |
| 30      | rs28631169   | chr14 | 73087                                        | 71970                                                 | 71970                                                 | 431343          | 16           | 13                                | 5              | 14           |
| 31      | rs2145587    | chr14 | 101981                                       | 101981                                                | 101981                                                | 1136813         | 3            | 1                                 | 5              | 12           |
| 32      | rs73241997   | chr14 | 52814                                        | 52814                                                 | 40018                                                 | 1281938         | 11           | 2                                 | 2              | 2            |
| 33      | rs2738413    | chr14 | 265420                                       | 263700                                                | 263700                                                | 1644751         | 16           | 8                                 | 11             | 18           |
| 34      | rs10873299   | chr14 | 9021                                         | 4604                                                  | 4604                                                  | 612750          | 11           | 1                                 | 1              | 5            |
| 35      | rs62011291   | chr15 | 88100                                        | 4494                                                  | 4494                                                  | 1056187         | 14           | 6                                 | 1              | 2            |
| 36      | rs12591736   | chr15 | 4437                                         | 2019                                                  | 0                                                     | 1394813         | 6            | 0                                 | 1              | 1            |
| 37      | rs7172038    | chr15 | 309356                                       | 211154                                                | 211154                                                | 1277907         | 13           | 3                                 | 9              | 29           |
| 38      | rs12908004   | chr15 | 47552                                        | 11273                                                 | 11273                                                 | 693374          | 5            | 0                                 | 1              | 0            |
| 39      | rs12908437   | chr15 | 48636                                        | 46621                                                 | 41685                                                 | 644716          | 3            | 1                                 | 5              | 16           |
| 40      | rs2286466    | chr16 | 137956                                       | 262255                                                | 117985                                                | 987553          | 52           | 34                                | 19             | 45           |
| 41      | rs2359171    | chr16 | 649635                                       | 223416                                                | 223416                                                | 2350218         | 8            | 3                                 | 21             | 28           |
| 42      | rs8073937    | chr17 | 311307                                       | 108367                                                | 105819                                                | 890905          | 61           | 46                                | 25             | 55           |
| 43      | rs72811294   | chr17 | 300000                                       | 0                                                     | 0                                                     | 1060218         | 6            | 2                                 | 14             | 25           |
| 44      | rs242557     | chr17 | 1035395                                      | 1035395                                               | 0                                                     | 1433098         | 15           | 11                                | 29             | 14           |
| 45      | rs7219869    | chr17 | 143338                                       | 14073                                                 | 10730                                                 | 1092468         | 2            | 1                                 | 2              | 0            |
| 46      | rs9953366    | chr18 | 41724                                        | 13806                                                 | 7878                                                  | 1064249         | 4            | 1                                 | 4              | 6            |
| 47      | rs6546620    | chr2  | 67055                                        | 55425                                                 | 34270                                                 | 1100530         | 15           | 0                                 | 3              | 3            |
| 48      | rs6742276    | chr2  | 520267                                       | 480006                                                | 475628                                                | 1197281         | 14           | 6                                 | 10             | 9            |
| 49      | rs2723064    | chr2  | 173036                                       | 151129                                                | 151129                                                | 366844          | 4            | 2                                 | 8              | 11           |
| 50      | rs6546553    | chr2  | 619648                                       | 525038                                                | 383381                                                | 999750          | 18           | 12                                | 20             | 33           |
| 51      | rs72926475   | chr2  | 398660                                       | 241293                                                | 198711                                                | 1991271         | 15           | 9                                 | 20             | 19           |
| 52      | rs12992412   | chr2  | 373109                                       | 41699                                                 | 0                                                     | 2036598         | 5            | 0                                 | 2              | 2            |
| 53      | rs56181519   | chr2  | 156580                                       | 156580                                                | 156580                                                | 354750          | 4            | 2                                 | 1              | 2            |
| 54      | rs2288327    | chr2  | 429119                                       | 348655                                                | 348655                                                | 2245406         | 12           | 6                                 | 64             | 94           |
| 55      | rs295114     | chr2  | 538568                                       | 419674                                                | 393818                                                | 939281          | 9            | 5                                 | 13             | 8            |
| 56      | rs2145274    | chr20 | 178987                                       | 34441                                                 | 0                                                     | 1797938         | 2            | 0                                 | 1              | 5            |
| 57      | rs7269123    | chr20 | 35025                                        | 0                                                     | 0                                                     | 793912          | 19           | 7                                 | 3              | 12           |
| 58      | rs2834618    | chr21 | 74805                                        | 74805                                                 | 74805                                                 | 1475436         | 5            | 0                                 | 1              | 0            |
| 59      | rs465276     | chr22 | 319686                                       | 314743                                                | 4011                                                  | 1382717         | 18           | 9                                 | 52             | 88           |
| 60      | rs7650482    | chr3  | 280900                                       | 247735                                                | 247735                                                | 499876          | 8            | 7                                 | 28             | 36           |
| 61      | rs73032363   | chr3  | 18059                                        | 11118                                                 | 0                                                     | 2566666         | 7            | 0                                 | 1              | 0            |
| 62      | rs6790396    | chr3  | 722403                                       | 722403                                                | 722403                                                | 1048125         | 15           | 17                                | 39             | 53           |
| 63      | rs2306272    | chr3  | 170743                                       | 54209                                                 | 54209                                                 | 711872          | 2            | 0                                 | 15             | 31           |
| 64      | rs17490701   | chr3  | 283834                                       | 184635                                                | 179731                                                | 399093          | 6            | 5                                 | 13             | 19           |
| 65      | rs4855075    | chr3  | 5507                                         | 5507                                                  | 3475                                                  | 653063          | 9            | 5                                 | 2              | 2            |
| 66      | rs9872035    | chr3  | 30682                                        | 0                                                     | 0                                                     | 638802          | 14           | 3                                 | 1              | 1            |
| 67      | rs3822259    | chr4  | 443541                                       | 24035                                                 | 4488                                                  | 1700498         | 4            | 1                                 | 13             | 33           |
| 68      | rs3960788    | chr4  | 399993                                       | 323098                                                | 283415                                                | 907032          | 9            | 5                                 | 12             | 11           |
| 69      | rs6847935    | chr4  | 1219388                                      | 1049429                                               | 879082                                                | 2139419         | 5            | 3                                 | 15             | 13           |
| 70      | rs55754224   | chr4  | 139401                                       | 115618                                                | 0                                                     | 2088187         | 3            | 1                                 | 8              | 10           |
| 71      | rs10213171   | chr4  | 610766                                       | 137368                                                | 122034                                                | 2313937         | 4            | 1                                 | 26             | 30           |
| 72      | rs10520260   | chr4  | 254716                                       | 176480                                                | 176480                                                | 846562          | 4            | 4                                 | 16             | 16           |
| 73      | rs716845     | chr5  | 722017                                       | 36726                                                 | 36726                                                 | 1705219         | 5            | 1                                 | 6              | 5            |
| 74      | rs10479177   | chr5  | 883050                                       | 1075334                                               | 852454                                                | 977406          | 22           | 15                                | 39             | 39           |
| 75      | rs174048     | chr5  | 356532                                       | 355429                                                | 355429                                                | 1261498         | 3            | 0                                 | 6              | 3            |
| 76      | rs6882776    | chr5  | 189934                                       | 150901                                                | 150901                                                | 645000          | 10           | 7                                 | 12             | 11           |
| 77      | rs73366713   | chr6  | 36748                                        | 36748                                                 | 36748                                                 | 855856          | 5            | 3                                 | 1              | 9            |
| 78      | rs34969716   | chr6  | 202360                                       | 202360                                                | 202360                                                | 1514842         | 11           | 3                                 | 4              | 3            |
| 79      | rs1307274    | chr6  | 1103                                         | 0                                                     | 0                                                     | 366843          | 4            | 1                                 | 0              | 0            |
| 80      | rs3176326    | chr6  | 14344                                        | 1701                                                  | 1701                                                  | 1285968         | 24           | 7                                 | 2              | 5            |
| 81      | rs6907805    | chr6  | 591697                                       | 186856                                                | 0                                                     | 1862438         | 12           | 6                                 | 12             | 11           |
| 82      | rs210632     | chr6  | 350492                                       | 0                                                     | 0                                                     | 1241625         | 12           | 6                                 | 5              | 7            |
| 83      | rs9481842    | chr6  | 468297                                       | 491790                                                | 468297                                                | 1068117         | 7            | 5                                 | 18             | 25           |
| 84      | rs868155     | chr6  | 607691                                       | 784363                                                | 322087                                                | 1682220         | 5            | 1                                 | 7              | 10           |
| 85      | rs12208899   | chr6  | 802067                                       | 0                                                     | 0                                                     | 1108593         | 7            | 5                                 | 14             | 9            |
| 86      | rs117984853  | chr6  | 122340                                       | 91328                                                 | 88571                                                 | 1103041         | 7            | 4                                 | 2              | 5            |
| 87      | rs11768850   | chr7  | 43739                                        | 28530                                                 | 0                                                     | 900400          | 7            | 2                                 | 7              | 12           |
| 88      | rs55734480   | chr7  | 14523                                        | 13777                                                 | 1705                                                  | 1842281         | 2            | 1                                 | 0              | 0            |
| 89      | rs6462078    | chr7  | 28625                                        | 8001                                                  | 8001                                                  | 870748          | 2            | 0                                 | 1              | 3            |
| 90      | rs74910854   | chr7  | 138446                                       | 24206                                                 | 0                                                     | 1210672         | 7            | 0                                 | 5              | 1            |
| 91      | rs62483627   | chr7  | 483589                                       | 439762                                                | 20592                                                 | 1003781         | 13           | 8                                 | 15             | 22           |
| 92      | rs11773845   | chr7  | 445841                                       | 440072                                                | 440072                                                | 761907          | 6            | 5                                 | 21             | 16           |
| 93      | rs55985730   | chr7  | 300000                                       | 0                                                     | 0                                                     | 1076132         | 20           | 14                                | 12             | 36           |
| 94      | rs7789146    | chr7  | 106668                                       | 55042                                                 | 49275                                                 | 1479465         | 32           | 12                                | 8              | 15           |
| 95      | rs7508       | chr8  | 251288                                       | 234737                                                | 223375                                                | 1592345         | 11           | 3                                 | 9              | 9            |
| 96      | rs7846485    | chr8  | 139915                                       | 110369                                                | 110369                                                | 2039607         | 18           | 9                                 | 5              | 5            |
| 97      | rs62521286   | chr8  | 449251                                       | 282391                                                | 282391                                                | 628875          | 13           | 11                                | 25             | 31           |
| 98      | rs35006907   | chr8  | 25428                                        | 10475                                                 | 8017                                                  | 612751          | 7            | 11                                | 3              | 6            |
| 99      | rs7460121    | chr8  | 43740                                        | 22229                                                 | 0                                                     | 427313          | 4            | 0                                 | 3              | 3            |
| 100     | rs6993266    | chr8  | 365331                                       | 344988                                                | 342369                                                | 834307          | 8            | 5                                 | 9              | 15           |
| 101     | rs4977397    | chr9  | 48926                                        | 23458                                                 | 19299                                                 | 1737469         | 9            | 0                                 | 0              | 1            |
| 102     | rs7026071    | chr9  | 710388                                       | 710388                                                | 710388                                                | 1241249         | 13           | 4                                 | 41             | 70           |
| 103     | rs4743034    | chr9  | 85939                                        | 11527                                                 | 7617                                                  | 1576219         | 2            | 0                                 | 5              | 7            |
| 104     | rs10760361   | chr9  | 39415                                        | 30422                                                 | 0                                                     | 640968          | 7            | 0                                 | 2              | 2            |
| SUM     |              |       | 30990268                                     | 23247497                                              | 17169975                                              | 133506072       | 1040         | 618                               | 1206           | 1750         |
| Average |              |       | 297983.3                                     | 223533.6                                              | 165095.9                                              | 1283712.2       | 10.0         | 5.9                               | 11.6           | 16.8         |

**Supplementary Table 2: Summary of top target gene(s) per AF locus**

| VR#  | SNP         | Gene            | TAD | PChI-C | LA-PCM | LA | RA | RA fetal | LA fetal | eQTL | Score |
|------|-------------|-----------------|-----|--------|--------|----|----|----------|----------|------|-------|
| 1    | rs187585530 | KIF1B           | +   | +      | ++     | ++ | ++ | +        | +        | 0    | 13    |
| 2    | rs880315    | KIF1B           | +   | +      | ++     | ++ | ++ | +        | +        | 0    | 13    |
| 3    | rs146518726 | EPS15           | +   | +      | ++     | ++ | ++ | ++       | ++       | 0    | 15    |
| 4.1  | rs1443926   | <i>HBXIP</i>    | -   | -      | ++     | ++ | ++ | ++       | ++       | 0    | 10    |
| 4.2  | rs1443926   | <i>ATP5F1</i>   | -   | -      | ++     | ++ | ++ | ++       | ++       | 0    | 10    |
| 5    | rs4484922   | CASQ2           | +   | -      | ++     | ++ | ++ | ++       | ++       | 0    | 12    |
| 6    | rs79187193  | PRKAB2          | +   | +      | ++     | ++ | ++ | +        | +        | 0    | 13    |
| 7.1  | rs11264280  | ADAR            | +   | +      | ++     | ++ | ++ | ++       | ++       | 0    | 15    |
| 7.2  | rs11264280  | ADAM15          | +   | +      | ++     | +  | -  | +        | ++       | 1    | 15    |
| 8    | rs72700114  | KIFAP3          | +   | +      | +      | ++ | ++ | ++       | ++       | 1    | 18    |
| 9    | rs503706    | KIFAP3          | +   | +      | +      | ++ | ++ | ++       | ++       | 1    | 18    |
| 10.1 | rs4590732   | FMOD            | -   | +      | ++     | +  | ++ | ++       | ++       | 0    | 12    |
| 10.2 | rs4590732   | BTG2            | -   | +      | ++     | ++ | ++ | ++       | +        | 0    | 12    |
| 11   | rs4951261   | NUCKS1          | +   | -      | ++     | ++ | ++ | ++       | ++       | 1    | 16    |
| 12   | rs7919685   | JMJD1C          | +   | +      | +      | ++ | ++ | ++       | ++       | 0    | 14    |
| 13   | rs6480708   | SYNPO2L         | +   | +      | ++     | ++ | ++ | ++       | ++       | 2    | 23    |
| 14.1 | rs11001667  | VDAC2           | -   | -      | ++     | ++ | ++ | ++       | ++       | 0    | 10    |
| 14.2 | rs11001667  | <i>RPS24</i>    | -   | -      | ++     | ++ | ++ | ++       | ++       | 0    | 10    |
| 15   | rs1044258   | MGEA5           | +   | +      | ++     | ++ | ++ | ++       | ++       | 0    | 15    |
| 16   | rs11598047  | SLK             | +   | +      | ++     | ++ | ++ | ++       | ++       | 0    | 15    |
| 17.1 | rs1822273   | <i>LDHA</i>     | -   | -      | ++     | ++ | ++ | ++       | ++       | 0    | 10    |
| 17.2 | rs1822273   | <i>CSRP3</i>    | -   | -      | ++     | ++ | ++ | ++       | ++       | 0    | 10    |
| 18.1 | rs949078    | <i>ARHGEF12</i> | -   | -      | ++     | ++ | ++ | ++       | ++       | 0    | 10    |
| 18.2 | rs949078    | <i>MIR125B1</i> | +   | -      | ++     | ++ | ++ | +        | +        | 0    | 10    |
| 18.3 | rs949078    | <i>HSPA8</i>    | -   | -      | ++     | ++ | ++ | ++       | ++       | 0    | 10    |
| 19   | rs76097649  | KCNJ5           | +   | -      | +      | -  | -  | +        | +        | 3    | 17    |
| 20   | rs10842383  | SSPN            | +   | -      | -      | ++ | ++ | ++       | ++       | 1    | 14    |
| 21   | rs113819537 | SSPN            | +   | -      | -      | ++ | ++ | ++       | ++       | 1    | 14    |
| 22   | rs12809354  | PKP2            | +   | +      | ++     | ++ | ++ | ++       | ++       | 0    | 15    |
| 23.1 | rs7978685   | ATP5B           | +   | +      | ++     | ++ | ++ | ++       | ++       | 0    | 15    |
| 23.2 | rs7978685   | NACA            | +   | +      | ++     | ++ | ++ | ++       | ++       | 0    | 15    |
| 24   | rs35349325  | CCT2            | +   | +      | ++     | ++ | ++ | ++       | ++       | 0    | 15    |
| 25.1 | rs11180703  | <i>ATXN7L3B</i> | -   | -      | ++     | ++ | ++ | ++       | ++       | 0    | 10    |
| 25.2 | rs11180703  | <i>NAP1L1</i>   | -   | -      | ++     | ++ | ++ | ++       | ++       | 0    | 10    |
| 26   | rs883079    | TBX5            | +   | +      | ++     | ++ | ++ | ++       | ++       | 2    | 23    |
| 27   | rs12810346  | TBX5            | -   | +      | ++     | ++ | ++ | ++       | ++       | 2    | 21    |
| 28   | rs12298484  | ZNF664          | +   | +      | +      | ++ | ++ | ++       | ++       | 1    | 18    |
| 29.1 | rs9580438   | <i>SAP18</i>    | -   | -      | ++     | ++ | ++ | ++       | ++       | 0    | 10    |
| 29.2 | rs9580438   | <i>FGF9</i>     | +   | +      | ++     | ++ | +  | -        | -        | 0    | 10    |
| 30.1 | rs28631169  | MYH6            | +   | +      | ++     | ++ | ++ | ++       | ++       | 0    | 15    |
| 30.2 | rs28631169  | PABPN1          | +   | +      | ++     | ++ | ++ | ++       | ++       | 0    | 15    |
| 31   | rs2145587   | ARHGAP5         | +   | +      | ++     | ++ | ++ | ++       | ++       | 0    | 15    |
| 32   | rs73241997  | SRP54           | +   | +      | +      | ++ | ++ | ++       | ++       | 0    | 14    |
| 33   | rs2738413   | SYNE2           | +   | +      | ++     | ++ | ++ | ++       | ++       | 2    | 23    |
| 34.1 | rs10873299  | IRF2BPL         | +   | +      | ++     | +  | +  | +        | ++       | 0    | 12    |
| 34.2 | rs10873299  | KIAA1737        | +   | -      | ++     | ++ | ++ | ++       | ++       | 0    | 12    |
| 35   | rs62011291  | FAM96A          | +   | +      | +      | ++ | ++ | ++       | ++       | 0    | 14    |

|      |            |          |   |   |    |    |    |    |    |   |    |
|------|------------|----------|---|---|----|----|----|----|----|---|----|
| 36   | rs12591736 | RPLP1    | + | - | ++ | ++ | ++ | ++ | ++ | 0 | 12 |
| 37   | rs7172038  | NPTN     | + | + | ++ | ++ | ++ | ++ | ++ | 0 | 15 |
| 38   | rs12908004 | PSMA4    | - | - | ++ | ++ | ++ | ++ | ++ | 0 | 10 |
| 39   | rs12908437 | IGF1R    | + | + | +  | +  | +  | +  | +  | 1 | 14 |
| 40   | rs2286466  | NDUFB10  | + | + | ++ | ++ | ++ | ++ | ++ | 0 | 15 |
| 41   | rs2359171  | DHX38    | + | + | ++ | +  | +  | +  | ++ | 0 | 12 |
| 42.1 | rs8073937  | GPS2     | + | + | ++ | ++ | ++ | ++ | ++ | 0 | 15 |
| 42.2 | rs8073937  | EIF4A1   | + | + | ++ | ++ | ++ | ++ | ++ | 0 | 15 |
| 42.3 | rs8073937  | TRAPPC1  | + | + | ++ | ++ | ++ | ++ | ++ | 0 | 15 |
| 43   | rs72811294 | MYOCD    | + | - | ++ | ++ | ++ | ++ | ++ | 0 | 12 |
| 44   | rs242557   | KPNB1    | - | + | ++ | ++ | ++ | ++ | ++ | 0 | 13 |
| 45.1 | rs7219869  | PRKAR1A  | - | - | ++ | ++ | ++ | ++ | ++ | 0 | 10 |
| 45.2 | rs7219869  | ABCA8    | - | - | ++ | ++ | ++ | ++ | ++ | 0 | 10 |
| 46   | rs9953366  | C18orf32 | + | + | -  | ++ | ++ | ++ | ++ | 0 | 13 |
| 47.1 | rs6546620  | HADHA    | + | - | ++ | ++ | ++ | ++ | ++ | 0 | 12 |
| 47.2 | rs6546620  | HADHB    | + | - | ++ | ++ | ++ | ++ | ++ | 0 | 12 |
| 48   | rs6742276  | USP34    | + | + | ++ | ++ | ++ | ++ | ++ | 0 | 15 |
| 49   | rs2723064  | CEP68    | + | + | ++ | ++ | +  | +  | +  | 2 | 20 |
| 50.1 | rs6546553  | SNRNP27  | + | + | ++ | +  | +  | +  | +  | 2 | 19 |
| 50.2 | rs6546553  | ANXA4    | + | + | -  | ++ | ++ | +  | +  | 2 | 19 |
| 51.1 | rs72926475 | IMMT     | + | + | ++ | ++ | ++ | ++ | ++ | 0 | 15 |
| 51.2 | rs72926475 | PTCD3    | + | + | ++ | ++ | ++ | ++ | ++ | 0 | 15 |
| 51.3 | rs72926475 | KDM3A    | + | + | ++ | ++ | ++ | ++ | ++ | 0 | 15 |
| 52   | rs12992412 | MMADHC   | - | - | +  | ++ | ++ | ++ | ++ | 0 | 9  |
| 53.1 | rs56181519 | CIR1     | + | - | +  | ++ | ++ | ++ | +  | 0 | 10 |
| 53.2 | rs56181519 | SP3      | - | - | ++ | ++ | ++ | ++ | ++ | 0 | 10 |
| 53.3 | rs56181519 | SCRN3    | + | - | ++ | ++ | ++ | +  | +  | 0 | 10 |
| 53.4 | rs56181519 | WIPF1    | + | - | -  | ++ | ++ | -  | -  | 1 | 10 |
| 53.5 | rs56181519 | ATP5G3   | - | - | ++ | ++ | ++ | ++ | ++ | 0 | 10 |
| 54   | rs2288327  | TTN      | + | - | ++ | ++ | ++ | ++ | ++ | 1 | 16 |
| 55   | rs295114   | SPATS2L  | + | + | +  | ++ | ++ | +  | +  | 0 | 12 |
| 56   | rs2145274  | TMX4     | - | - | ++ | ++ | ++ | ++ | ++ | 0 | 10 |
| 57   | rs7269123  | RPS21    | + | + | ++ | ++ | ++ | ++ | ++ | 0 | 15 |
| 58.1 | rs2834618  | TMEM50B  | - | - | ++ | ++ | ++ | ++ | ++ | 0 | 10 |
| 58.2 | rs2834618  | ATP5O    | - | - | ++ | ++ | ++ | ++ | ++ | 0 | 10 |
| 59   | rs465276   | MICAL3   | + | + | ++ | +  | +  | ++ | ++ | 0 | 13 |
| 60.1 | rs7650482  | MKRN2    | + | + | ++ | ++ | ++ | +  | ++ | 1 | 18 |
| 60.2 | rs7650482  | CAND2    | + | + | +  | +  | +  | +  | +  | 2 | 18 |
| 61   | rs73032363 | RPL15    | + | - | ++ | ++ | ++ | ++ | ++ | 0 | 12 |
| 62   | rs6790396  | SCN5A    | + | + | ++ | ++ | ++ | ++ | ++ | 1 | 19 |
| 63   | rs2306272  | LRIG1    | + | - | +  | ++ | ++ | ++ | ++ | 0 | 11 |
| 64.1 | rs17490701 | PHLDB2   | + | + | +  | ++ | ++ | +  | +  | 0 | 12 |
| 64.2 | rs17490701 | ABHD10   | + | + | +  | ++ | ++ | +  | +  | 0 | 12 |
| 65   | rs4855075  | MFN1     | + | + | ++ | ++ | ++ | ++ | ++ | 0 | 15 |
| 66   | rs9872035  | NCBP2    | - | + | ++ | ++ | ++ | ++ | ++ | 0 | 13 |
| 67   | rs3822259  | ZNF518B  | + | + | ++ | ++ | ++ | +  | +  | 0 | 13 |
| 68   | rs3960788  | UBE2D3   | + | + | ++ | ++ | ++ | ++ | ++ | 1 | 19 |
| 69   | rs6847935  | PITX2    | + | + | +  | +  | -  | -  | ++ | 2 | 17 |
| 70   | rs55754224 | CAMK2D   | + | + | +  | ++ | ++ | ++ | ++ | 0 | 14 |
| 71   | rs10213171 | ARHGAP10 | + | + | +  | ++ | ++ | ++ | ++ | 0 | 14 |

|       |             |          |   |   |    |    |    |    |    |   |    |
|-------|-------------|----------|---|---|----|----|----|----|----|---|----|
| 72    | rs10520260  | HAND2    | + | + | ++ | ++ | ++ | ++ | ++ | 0 | 15 |
| 73    | rs716845    | YTHDC2   | + | - | ++ | ++ | ++ | +  | +  | 0 | 10 |
| 74    | rs10479177  | FAM13B   | + | + | +  | ++ | ++ | +  | ++ | 2 | 21 |
| 75    | rs174048    | NR3C1    | + | - | +  | ++ | ++ | ++ | ++ | 0 | 11 |
| 76    | rs6882776   | ATP6V0E1 | + | + | +  | ++ | ++ | ++ | ++ | 0 | 14 |
| 77    | rs73366713  | DEK      | - | - | +  | ++ | ++ | ++ | ++ | 1 | 13 |
| 78    | rs34969716  | DEK      | + | - | +  | ++ | ++ | ++ | ++ | 1 | 15 |
| 79.1  | rs1307274   | BRD2     | - | - | ++ | ++ | ++ | ++ | ++ | 0 | 10 |
| 79.2  | rs1307274   | RPS18    | - | - | ++ | ++ | ++ | ++ | ++ | 0 | 10 |
| 79.3  | rs1307274   | MNF1     | - | - | ++ | ++ | ++ | ++ | ++ | 0 | 10 |
| 79.4  | rs1307274   | RPL10A   | - | - | ++ | ++ | ++ | ++ | ++ | 0 | 10 |
| 80    | rs3176326   | SRSF3    | + | + | ++ | ++ | ++ | ++ | ++ | 0 | 15 |
| 81    | rs6907805   | ZNF292   | + | + | ++ | ++ | ++ | ++ | ++ | 0 | 15 |
| 82    | rs210632    | PLN      | - | - | ++ | ++ | ++ | ++ | ++ | 1 | 14 |
| 83    | rs9481842   | PLN      | + | - | ++ | ++ | ++ | ++ | ++ | 1 | 16 |
| 84    | rs868155    | GJA1     | + | + | ++ | ++ | ++ | ++ | ++ | 1 | 19 |
| 85    | rs12208899  | RPS12    | + | + | ++ | ++ | ++ | ++ | ++ | 0 | 15 |
| 86    | rs117984853 | PPIL4    | + | + | +  | ++ | ++ | ++ | +  | 0 | 13 |
| 87    | rs11768850  | PDGFA    | + | + | +  | ++ | ++ | +  | +  | 0 | 12 |
| 88    | rs55734480  | ETV1     | + | + | +  | ++ | ++ | ++ | ++ | 0 | 14 |
| 89    | rs6462078   | TAX1BP1  | - | - | +  | ++ | ++ | ++ | ++ | 0 | 9  |
| 90.1  | rs74910854  | BAZ1B    | - | - | ++ | ++ | ++ | ++ | ++ | 0 | 10 |
| 90.2  | rs74910854  | MDH2     | - | - | ++ | ++ | ++ | ++ | ++ | 0 | 10 |
| 90.3  | rs74910854  | HSPB1    | - | - | ++ | ++ | ++ | ++ | ++ | 0 | 10 |
| 90.4  | rs74910854  | YWHAG    | - | - | ++ | ++ | ++ | ++ | ++ | 0 | 10 |
| 91.1  | rs62483627  | HBP1     | + | + | ++ | ++ | ++ | ++ | ++ | 0 | 15 |
| 91.2  | rs62483627  | DLD      | + | + | ++ | ++ | ++ | ++ | ++ | 0 | 15 |
| 92    | rs11773845  | CAV1     | + | + | ++ | ++ | ++ | ++ | ++ | 2 | 23 |
| 93.1  | rs55985730  | CALU     | + | + | ++ | ++ | ++ | ++ | ++ | 0 | 15 |
| 93.2  | rs55985730  | FLNC     | + | + | ++ | ++ | ++ | ++ | ++ | 0 | 15 |
| 94    | rs7789146   | KCNH2    | + | + | ++ | +  | ++ | ++ | +  | 0 | 13 |
| 95.1  | rs7508      | PCM1     | + | - | ++ | ++ | ++ | ++ | ++ | 2 | 20 |
| 95.2  | rs7508      | ASAH1    | + | - | ++ | ++ | ++ | ++ | ++ | 2 | 20 |
| 96    | rs7846485   | XPO7     | + | + | +  | ++ | ++ | ++ | ++ | 0 | 14 |
| 97    | rs62521286  | MTSS1    | + | + | +  | ++ | ++ | +  | +  | 1 | 16 |
| 98    | rs35006907  | MTSS1    | + | + | +  | ++ | ++ | +  | +  | 1 | 16 |
| 99.1  | rs7460121   | ST3GAL1  | - | - | ++ | ++ | ++ | +  | +  | 0 | 8  |
| 99.2  | rs7460121   | MIR30B   | + | - | ++ | ++ | ++ | -  | -  | 0 | 8  |
| 100   | rs6993266   | PTK2     | + | + | +  | ++ | ++ | ++ | ++ | 0 | 14 |
| 101.1 | rs4977397   | RRAGA    | - | - | ++ | ++ | ++ | ++ | ++ | 0 | 10 |
| 101.2 | rs4977397   | RPS6     | - | - | ++ | ++ | ++ | ++ | ++ | 0 | 10 |
| 102.1 | rs7026071   | FAM120A  | - | - | +  | ++ | ++ | ++ | ++ | 0 | 9  |
| 102.2 | rs7026071   | FANCC    | + | - | -  | +  | +  | -  | +  | 1 | 9  |
| 103   | rs4743034   | RAD23B   | + | - | +  | ++ | ++ | ++ | ++ | 0 | 11 |
| 104.1 | rs10760361  | RC3H2    | - | - | ++ | ++ | ++ | ++ | ++ | 0 | 10 |
| 104.2 | rs10760361  | PSMB7    | + | - | +  | ++ | +  | ++ | ++ | 0 | 10 |
| 104.3 | rs10760361  | RPL35    | - | - | ++ | ++ | ++ | ++ | ++ | 0 | 10 |
| 104.4 | rs10760361  | HSPA5    | - | - | ++ | ++ | ++ | ++ | ++ | 0 | 10 |



**Supplementary Table 3: ATAC-seq motif enrichment**

| MOTIF        | background |        | enrichment | Z-statistic | p-value | %ATAC  | %bg    |
|--------------|------------|--------|------------|-------------|---------|--------|--------|
|              | ATAC (55k) | (100k) |            |             |         |        |        |
| HEY2         | 994        | 121    | 8.21       | 79.4510     | <0.0001 | 1.81   | 0.22   |
| MEF2A        | 1482       | 199    | 7.45       | 91.1140     | <0.0001 | 2.69   | 0.36   |
| CTCF         | 3325       | 807    | 4.12       | 140.7920    | <0.0001 | 6.05   | 1.47   |
| Tbx3_custom  | 13045      | 3515   | 3.71       | 166.1       | <0.0001 | 23.72  | 6.39   |
| COUP-TF2     | 462        | 153    | 3.02       | 25.0160     | <0.0001 | 0.84   | 0.28   |
| MEF2D        | 1202       | 549    | 2.19       | 28.0100     | <0.0001 | 2.19   | 1.00   |
| MEF2B        | 1147       | 524    | 2.19       | 27.3460     | <0.0001 | 2.09   | 0.95   |
| MEF2C        | 1825       | 1033   | 1.77       | 24.8770     | <0.0001 | 3.32   | 1.88   |
| GATA6        | 735        | 427    | 1.72       | 14.9630     | <0.0001 | 1.34   | 0.78   |
| T            | 185        | 108    | 1.71       | 7.4170      | <0.0001 | 0.34   | 0.20   |
| Gata4        | 401        | 244    | 1.64       | 10.0730     | <0.0001 | 0.73   | 0.44   |
| TBX2         | 252        | 159    | 1.58       | 7.3860      | <0.0001 | 0.46   | 0.29   |
| Tcf12        | 670        | 439    | 1.53       | 11.0690     | <0.0001 | 1.22   | 0.80   |
| HEY1         | 179        | 121    | 1.48       | 5.2790      | <0.0001 | 0.33   | 0.22   |
| TBX20        | 280        | 217    | 1.29       | 4.2850      | <0.0001 | 0.51   | 0.39   |
| TBX19        | 189        | 164    | 1.15       | 1.9550      | 0.0506  | 0.34   | 0.30   |
| TBX21        | 238        | 225    | 1.06       | 0.8680      | 0.3851  | 0.43   | 0.41   |
| Gata1        | 83467      | 79732  | 1.05       | NA          | NA      | 151.76 | 144.97 |
| TBX1/4/5/15  | 8825       | 8798   | 1.00       | 0.3140      | 0.7535  | 16.05  | 16.00  |
| MEIS1        | 11482      | 12131  | 0.95       | 6.6740      | <0.0001 | 20.88  | 22.06  |
| PITX3        | 596        | 634    | 0.94       | 1.5180      | 0.1290  | 1.08   | 1.15   |
| SMAD2/3/4    | 598        | 719    | 0.83       | 4.5420      | <0.0001 | 1.09   | 1.31   |
| Smad4        | 2319       | 2796   | 0.83       | 9.2590      | <0.0001 | 4.22   | 5.08   |
| Gata4_custom | 11806      | 14490  | 0.81       | 26.0        | <0.0001 | 21.47  | 26.35  |
| GATA3        | 33102      | 46351  | 0.71       | 155.1860    | <0.0001 | 60.19  | 84.27  |
| TCF4         | 208        | 296    | 0.70       | 5.1290      | <0.0001 | 0.38   | 0.54   |
| Hand1Tcf3    | 175        | 296    | 0.59       | 7.0520      | <0.0001 | 0.32   | 0.54   |
| Nkx2-5       | 8823       | 19339  | 0.46       | 93.9200     | <0.0001 | 16.04  | 35.16  |
| Tcf3         | 88         | 261    | 0.34       | 10.7340     | <0.0001 | 0.16   | 0.47   |
| Shox2        | 1476       | 5466   | 0.27       | 56.8680     | <0.0001 | 2.68   | 9.94   |
| SMAD3        | 34         | 132    | 0.26       | 8.5400      | <0.0001 | 0.06   | 0.24   |

[https://www.medcalc.org/calc/test\\_one\\_proportion.php](https://www.medcalc.org/calc/test_one_proportion.php)

Supplementary Table 4: EMERGE datasets

| Dataset      | Type                    | Genome | Tissue               | Stage                          | Source          | Deposit     | # of Peaks         |
|--------------|-------------------------|--------|----------------------|--------------------------------|-----------------|-------------|--------------------|
| Conservation | PhastCons               | hg19   | all                  | all                            | Siepel lab      | UCSC        | 10121233 (174584)* |
| CTCF         | ChIP-seq                | hg19   | HCM cells            | cell line                      | ENCODE          | GSE30263    | 41966              |
| DHSs         | Dnase1 hypersensitivity | hg19   | cerebellum           | adult                          | ENCODE          | GSE32970    | 104575             |
| DHSs         | Dnase1 hypersensitivity | hg19   | cerebrum             | adult                          | ENCODE          | GSE32970    | 135930             |
| DHSs         | Dnase1 hypersensitivity | hg19   | frontal_cortex       | adult                          | ENCODE          | GSE32970    | 110989             |
| DHSs         | Dnase1 hypersensitivity | hg19   | HCM cells            | cell line                      | ENCODE          | GSE26328    | 317895             |
| DHSs         | Dnase1 hypersensitivity | hg19   | heart                | adult                          | ENCODE          | GSE32970    | 124949             |
| H3K27ac      | ChIP-seq                | hg19   | brain                | fetal 12w post-gest.           | Guo lab         | GSE63634    | 77355              |
| H3K27ac      | ChIP-seq                | hg19   | cerebellum           | adult                          | Creyghton lab   | GSE40465    | 174090             |
| H3K27ac      | ChIP-seq                | hg19   | fibroblast cell line | induced myocytes D6            | Cao lab         | GSE78096    | 33954              |
| H3K27ac      | ChIP-seq                | hg19   | fibroblast cell line | induced myocytes D11           | Cao lab         | GSE78096    | 36649              |
| H3K27ac      | ChIP-seq                | hg19   | heart                | fetal 12w post-gest.           | Guo lab         | GSE63634    | 49185              |
| H3K27ac      | ChIP-seq                | hg19   | iPSC                 | induced myocytes               | Sakabe lab      | GSE77267    | 19528              |
| H3K27ac      | ChIP-seq                | hg19   | left ventricle       | adult                          | Ren lab         | GSE16256    | 59070              |
| H3K27ac      | ChIP-seq                | hg19   | limbs                | gest. E33                      | Cotney lab      | GSE42413    | 72841              |
| H3K27ac      | ChIP-seq                | hg19   | limbs                | gest. E41                      | Cotney lab      | GSE42413    | 42284              |
| H3K27ac      | ChIP-seq                | hg19   | limbs                | gest. E44                      | Cotney lab      | GSE42413    | 69409              |
| H3K27ac      | ChIP-seq                | hg19   | limbs                | gest. E47                      | Cotney lab      | GSE42413    | 54981              |
| H3K27ac      | ChIP-seq                | hg19   | liver                | fetal 12w post-gest.           | Guo lab         | GSE63634    | 27741              |
| H3K27ac      | ChIP-seq                | hg19   | right ventricle      | adult                          | Ren lab         | GSE16256    | 126802             |
| H3K27me3     | ChIP-seq                | hg19   | brain                | fetal 12w post-gest.           | Guo lab         | GSE63634    | 50180              |
| H3K27me3     | ChIP-seq                | hg19   | fibroblast cell line | induced myocytes D6            | Cao lab         | GSE78096    | 275                |
| H3K27me3     | ChIP-seq                | hg19   | fibroblast cell line | induced myocytes D11           | Cao lab         | GSE78096    | 173                |
| H3K27me3     | ChIP-seq                | hg19   | heart                | fetal 12w post-gest.           | Guo lab         | GSE63634    | 34795              |
| H3K27me3     | ChIP-seq                | hg19   | hESC                 | induced myocytes 14d           | Murry lab       | SRRS77565   | 86945              |
| H3K27me3     | ChIP-seq                | hg19   | iPSC                 | induced myocytes               | Sakabe lab      | GSE77267    | 8952               |
| H3K27me3     | ChIP-seq                | hg19   | liver                | fetal 12w post-gest.           | Guo lab         | GSE63634    | 41712              |
| H3K36me3     | ChIP-seq                | hg19   | hESC                 | induced myocytes 14d           | Murry lab       | SRRS77574   | 118126             |
| H3K4me1      | ChIP-seq                | hg19   | brain                | fetal 12w post-gest.           | Guo lab         | GSE63634    | 58426              |
| H3K4me1      | ChIP-seq                | hg19   | heart                | fetal (d105)                   | BROAD institute | GSE17312    | 113536             |
| H3K4me1      | ChIP-seq                | hg19   | heart                | fetal 12w post-gest.           | Guo lab         | GSE63634    | 59026              |
| H3K4me1      | ChIP-seq                | hg19   | iPSC                 | induced myocytes               | Sakabe lab      | GSE77267    | 13902              |
| H3K4me1      | ChIP-seq                | hg19   | liver                | fetal 12w post-gest.           | Guo lab         | GSE63634    | 43426              |
| H3K4me3      | ChIP-seq                | hg19   | brain                | fetal 12w post-gest.           | Guo lab         | GSE63634    | 16745              |
| H3K4me3      | ChIP-seq                | hg19   | fibroblast cell line | induced myocytes D6            | Cao lab         | GSE78096    | 18720              |
| H3K4me3      | ChIP-seq                | hg19   | fibroblast cell line | induced myocytes D11           | Cao lab         | GSE78096    | 19871              |
| H3K4me3      | ChIP-seq                | hg19   | HCM cells            | cell line                      | ENCODE          | GSE35583    | 49247              |
| H3K4me3      | ChIP-seq                | hg19   | heart                | fetal (d105)                   | BROAD institute | GSE17312    | 1238               |
| H3K4me3      | ChIP-seq                | hg19   | heart                | fetal 12w post-gest.           | Guo lab         | GSE63634    | 86937              |
| H3K4me3      | ChIP-seq                | hg19   | heart                | induced myocytes 14d           | Murry lab       | SRRS77568   | 26960              |
| H3K4me3      | ChIP-seq                | hg19   | iPSC                 | induced myocytes               | Sakabe lab      | GSE77267    | 10760              |
| H3K4me3      | ChIP-seq                | hg19   | liver                | fetal 12w post-gest.           | Guo lab         | GSE63634    | 11799              |
| H3K9ac       | ChIP-seq                | hg19   | heart                | fetal (d105)                   | BROAD institute | GSE17312    | 49876              |
| p300         | ChIP-seq                | hg19   | cortex               | fetal (gest. week 20)          | Pennacchio lab  | GSE42881    | 642876             |
| p300         | ChIP-seq                | hg19   | heart                | adult                          | Pennacchio lab  | GSE32587    | 139824             |
| p300         | ChIP-seq                | hg19   | heart                | fetal (gest. week 16)          | Pennacchio lab  | GSE32587    | 108384             |
| Pol2         | ChIP-seq                | hg19   | heart                | fetal (gest. week 16)          | Pennacchio lab  | GSE32587    | 223086             |
| Pol2         | ChIP-seq                | hg19   | iPSC                 | induced myocytes               | Sakabe lab      | GSE77267    | 11332              |
| ATAC         | ATAC-seq                | hg19   | SANLPCs              | induced SAN myocytes           | Protze lab      | unpublished | 45389              |
| ATAC         | ATAC-seq                | hg19   | hESC                 | 0d H1 differentiated myocytes  | Snyder lab      | GSE85330    | 54378              |
| ATAC         | ATAC-seq                | hg19   | hESC                 | 2d H1 differentiated myocytes  | Snyder lab      | GSE85330    | 21979              |
| ATAC         | ATAC-seq                | hg19   | hESC                 | 4d H1 differentiated myocytes  | Snyder lab      | GSE85330    | 28991              |
| ATAC         | ATAC-seq                | hg19   | hESC                 | 30d H1 differentiated myocytes | Snyder lab      | GSE85330    | 11931              |
| ATAC         | ATAC-seq                | hg19   | hESC                 | 0d H9 differentiated myocytes  | Snyder lab      | GSE85330    | 28417              |
| ATAC         | ATAC-seq                | hg19   | hESC                 | 2d H9 differentiated myocytes  | Snyder lab      | GSE85330    | 10980              |
| ATAC         | ATAC-seq                | hg19   | hESC                 | 4d H9 differentiated myocytes  | Snyder lab      | GSE85330    | 26580              |
| ATAC         | ATAC-seq                | hg19   | hESC                 | 30d H9 differentiated myocytes | Snyder lab      | GSE85330    | 24661              |
| ATAC         | ATAC-seq                | hg19   | iPSC                 | 0d C15 induced myocytes        | Snyder lab      | GSE85330    | 37100              |
| ATAC         | ATAC-seq                | hg19   | iPSC                 | 2d C15 induced myocytes        | Snyder lab      | GSE85330    | 35192              |
| ATAC         | ATAC-seq                | hg19   | iPSC                 | 4d C15 induced myocytes        | Snyder lab      | GSE85330    | 13920              |
| ATAC         | ATAC-seq                | hg19   | iPSC                 | 30d C15 induced myocytes       | Snyder lab      | GSE85330    | 16191              |
| ATAC         | ATAC-seq                | hg19   | iPSC                 | 0d C20 induced myocytes        | Snyder lab      | GSE85330    | 27217              |
| ATAC         | ATAC-seq                | hg19   | iPSC                 | 2d C20 induced myocytes        | Snyder lab      | GSE85330    | 22065              |
| ATAC         | ATAC-seq                | hg19   | iPSC                 | 4d C20 induced myocytes        | Snyder lab      | GSE85330    | 51994              |
| ATAC         | ATAC-seq                | hg19   | iPSC                 | 30d C20 induced myocytes       | Snyder lab      | GSE85330    | 19602              |
| ATAC         | ATAC-seq                | hg19   | hESC                 | cardiac mesoderm H7            | Weissman lab    | GSE85066    | 180380             |
| ATAC         | ATAC-seq                | hg19   | left ventricle       | induced LV myocytes            | Protze lab      | unpublished | 38335              |
| ATAC         | ATAC-seq                | hg19   | left atrium          | adult                          | Martin lab      | unpublished | 55045              |
| DHSs         | Dnase1 hypersensitivity | hg19   | limbs                | fetal                          | ENCODE          | GSE90405    | 95652              |
| Med1         | ChIP-seq                | hg19   | iPSC                 | induced myocytes 32d           | Srivastava lab  | GSE85631    | 15400              |

\*number of ultra-conserved phastCons (score≥600)

## Human functional genomic datasets included in merge as possible predictors

**Supplementary Table 5: Guide and (q)PCR primer sequences**

| <b>qPCR primers</b> | <b>Sequence 5' to 3'</b>  | <b>CRISPR guides</b>    | <b>Sequence 5' to 3'</b> |
|---------------------|---------------------------|-------------------------|--------------------------|
| Cx43_F              | AGTACCCAACAGCAGCAGAC      | Gja1 guide 1            | CTCTACGATAGGCATAATAATGG  |
| Cx43_R              | AAAATGAAGAGCACCGACAG      | Gja1 guide 2            | GAGTGCCAATATCAGATTCTGG   |
| Hsf2_F              | GTCCAGCTAAACGGCTCCTC      | Kcnn3 guide1            | GGCCTGGACTCTGTTCACCT     |
| Hsf2_R              | ACTGTCTTCTGAGAGCATAGC     | Kcnn3 guide2            | GGTGGTTCATCCCCATTGCA     |
| Serinc1_F           | TTGCTCGTCGGAGTATGTGT      | Zfx3 guide 1            | TAGGCAGAGCTGTCTAATAAC    |
| Serinc1_R           | AGCTTTGTAGCCAACCAGGAT     | Zfx3 guide 2            | TAGGACTCCGCTATGACAGCAG   |
| Txn14b_F            | GCAAGAAAGAAGTAGACCAGGC    |                         |                          |
| Txn14b_R            | ACTCAGGTCGGCTGAAGTTT      | <b>Luciferase assay</b> | <b>Sequence 5' to 3'</b> |
| Dhx38_F             | TGACCACCAAGGAGTACATGC     | rs2177843_F             | AGAGTGTTGTTCTCCAAGGCAA   |
| Dhx38_R             | CTTCTTTAGCCCGACGACGA      | rs2177843_R             | AGGAGCATGGTACCTTGAGTG    |
| Zfx3_F              | AAGCCGTTGAAGATGCCGAA      | rs9481825_F             | AGGTGACAACCAATTCCACCTT   |
| Zfx3_R              | TTGCAGGGGAATCCGTCAAC      | rs9481825_R             | CTGGCCGAGTAGTCACCTTTT    |
| Hprt_Fw             | TGTTGGATATGCCCTTGACT      | rs939601_F              | TGATTCTGGATTCTGCCATCT    |
| Hprt_Rv             | GATTCAACTTGCCTCATCT       | rs939601_R              | GAGCACAGGATCTCTGCTTGA    |
| cTnI F              | TCGGGTGGACAAAGTGGATG      | rs7312625_F             | CCTCGGTTGGAATGTTCCCT     |
| cTnI R              | AAACTTGCCACGGAGGTCAT      | rs7312625_R             | AGATGTTGGCACTCAAGGCA     |
| Ube2q1_F            | AGGAGCAGACTTCATCCTACTTAAC | rs2270188_F             | CGTCAGGTTGGCTGACAGTT     |
| Ube2q1_R            | CCACCCAGAACATACCCTCC      | rs2270188_R             | CAGGGGCAAAGTTGAAGCAG     |
| Adar_F              | AAAATCCCAAGCAAGGCAAGC     | rs10786775_F            | CATGCCTGTGGTCCCAGTTA     |
| Adar_R              | ATGGTACGGAGTCTTTCCCCA     | rs10786775_R            | AACAACCACATGATGTTCCCTG   |
| kcnk3_F             | GACCGAACTGTCTTGGGGTT      | rs2595104_F             | CCAGCCAATCAAGCAACGAC     |
| kcnk3_R             | ACTTCCCTTGTGTGATAGGCG     | rs2595104_R             | GCCGTTGAATGTCTCTTCTCCA   |
| Pmvk_F              | CGGAAGATTGTGGAAGGCGT      | rs9302644_F             | AGGAATACTGGGGTAAGGAGGT   |
| Pmvk_R              | GGATGTCAGATGTCTCCGTG      | rs9302644_R             | AACACACGAAGGGCTGTTCA     |
| Pbx1_F              | AACTTACCCTCCAGTCCCAGA     | rs2739197_F             | CACACCAAATCTCCTGGGACG    |
| Pbx1_R              | GGTCTCCACATCTACGGGT       | rs2739197_R             | GGAAACTCCGCGCCTAGAG      |
| Pygo2_F             | AGCCCTGAAAAGAAGCGAAGA     | rs10821415_F            | CAGAGCAGCAGGTGGGTATT     |
| Pygo2_R             | TTCAAGGGCTTCCCACCATC      | rs10821415_R            | GCTGTGCCAAGTACTAAGTGGA   |
| Shc1_F              | GAATCCACCGAAGCTGGTCA      | rs2278933_F             | ACATCCCCTGGCACTTGAG      |
| Shc1_R              | CGAAGCCTCATATCTACCACCC    | rs2278933_R             | CCTGTGCTAAGCTAGTGGCA     |
| Flad1_F             | CCATTTTCAGTCCCACCGACC     |                         |                          |
| Flad1_R             | GGCTCAGGCACTTCAGGG        |                         |                          |
| Zbtb7b_F            | AGAAGCCCTTTGCCTGTGAG      |                         |                          |
| Zbtb7b_R            | TGTGGTTCTTGAGGTCGTAGC     |                         |                          |
| Adam15_F            | CACAGCAGATGACAGGCACTA     |                         |                          |
| Adam15_R            | GGATTGGATCGGTCAGCCAG      |                         |                          |
| Efna1_F             | GGCAAGGAGTTCAAGGAAGGA     |                         |                          |
| Efna1_R             | TGACATGGGCCTGGGGATTA      |                         |                          |
| Dpm3_F              | CGGAGCCAACATGACGAAGT      |                         |                          |
| Dpm3_R              | CAGCGGAGACCAACAGGTAG      |                         |                          |
| Slc50a1_F           | GCTCCGCCTCTTGGTCTATT      |                         |                          |
| Slc50a1_R           | CGGTAATTCCTGTCTTGCTCT     |                         |                          |
| Krtcap2_F           | TTCTCCTCTGCTTGCTGTTGG     |                         |                          |
| Krtcap2_R           | CAGTGATTTTGGCCGGTGTG      |                         |                          |
| Rpl32_F             | GGTGAAGCCCAAGATCGTCA      |                         |                          |
| Rpl32_R             | TCTGGCCCTTGAACCTTCTC      |                         |                          |
| ppia_F              | GGGTGGTGACTTTACACGCC      |                         |                          |
| ppia_R              | CTTGCCATCCAGCCATTGAG      |                         |                          |
| rpl4_F              | GCCGCTGGTGGTTGAAGATAA     |                         |                          |
| rpl4_R              | CGTCGGTTTCTCATTTTGCCC     |                         |                          |

## 1 **Supplementary Methods**

### 2 **Nuclei isolation**

3 Nuclear isolation was performed as previously published<sup>1</sup> using an adapted protocol. Samples were kept  
4 at 4°C throughout the procedure. In short, approximately 100mg tissue was trimmed to 2mm pieces, and  
5 homogenized in lysis buffer containing RNase inhibitor for 10 seconds at maximum speed using an Ultra-  
6 Turrax homogenizer. Samples were homogenized further using a douncer with loose pestle (10 strokes).  
7 After a 10-minute incubation in the lysis buffer, 10 strokes were performed with a tight pestle. The lysis  
8 procedure was monitored by light microscopy to ensure complete tissue and cell lysis and efficient nuclear  
9 extraction. The crude lysate was consecutively passed through mesh filters with pore size of 100 µm and  
10 30 µm. The final lysate was spun at 1000xg for 5 minutes and the resulting pellet was resuspended in 500  
11 µl staining buffer (5% BSA in PBS) supplemented with RNase inhibitor.

### 12 **Library preparation and sequencing**

13 For adult left and right atria, whole transcriptome amplification was performed using NuGEN's Ovation  
14 RNA-Seq V2 kit (San Carlos, CA) according to manufacturer's instructions. For fetal left and right atria,  
15 Truseq Stranded Total RNA Library Preparation kit (Illumina, San Diego, CA) was used according to  
16 manufacturer's instructions (with 15 PCR cycles). For whole tissue, 50 ng of RNA was used as input, for  
17 RNA isolated from cardiomyocyte nuclei approximately 600 pg was used as input. 500 ng cDNA was  
18 fragmented to 200-400 bp using Covaris S2 Focused ultrasonicator (Woburn, MA) and the fragmentation  
19 parameters described in the NuGEN ENCORE NGS library preparation protocol. Library preparation was  
20 done with Ovation Ultralow System V2 using 10 pg-100 ng of fragmented double-stranded DNA.  
21 Sequencing was performed on an Illumina HiSeq4000 sequencing system (50-bp single reads).

### 22 **Differential expression analysis**

23 Reads were mapped to hg19 build of the human transcriptome using STAR<sup>2</sup>. Differential expression  
24 analysis was performed using the DESeq2 package based on a model using the negative binomial  
25 distribution<sup>3</sup>. The false discovery rate (FDR) method of Benjamini-Hochberg ( $p < 0.05$ ) was used to correct  
26 p-values for multiple testing.

27 Unsupervised hierarchical clustering was performed on genes differentially expressed using the R package  
28 pheatmap, version 1.0.8. (<http://cran.r-project.org/web/packages/pheatmap/index.html>). DAVID<sup>4</sup> was  
29 used to find overrepresented gene ontology (GO) terms and Kegg pathways in the categories 'biological  
30 process' and 'molecular function'. Benjamini-Hochberg correction was performed for multiple testing-  
31 controlled P values. Significantly enriched terms were functionally grouped and visualized. The highest  
32 significant term of the group was displayed as leading term. Datasets were normalized to reference genes  
33 expressed in all datasets (*RPL32*, *RPL4* and *H2AF2*<sup>5</sup>), after which expression was set per dataset at the  
34 median, and high expression at the third quartile to enable categorization of expression for target gene  
35 identification. HOMER analysis was performed as described<sup>6</sup>.

## 36 **EMERGE**

37 Enrichment of putative heart enhancers was tested as predicted by EMERGE. A total of 70 selected  
38 functional genomic datasets from a variety of cardiomyocyte (CM) containing tissues, including whole  
39 hearts and CMs differentiated from human embryonic and induced pluripotent stem cells (both publicly  
40 available and in-house), was integrated using EMERGE. This included CHIP-seq data of enhancer-associated  
41 histone methylation marks and transcription factor binding sites and chromatin accessibility data as  
42 assessed by DNase1-hypersensitivity and ATAC-seq. Subsequently an overall heart enhancer prediction  
43 track was generated by assigning weights to all 70 selected functional genomic datasets through a logistic  
44 regression modelling approach that determines a best fit on 84 validated heart enhancers<sup>7</sup>.

## 45 **ATAC-seq footprinting**

46 ATAC-seq footprinting was performed as previously described<sup>8</sup>.

#### 47 **qPCR**

48 Total RNA was isolated from using TRIzol Reagent according to the manufacturer's protocol (Thermo Fisher  
49 Scientific, Bleiswijk, the Netherlands). Concentration of RNA was measured using Nanodrop. Genomic DNA  
50 was removed using DNase treatment. The Superscript II system (Thermo Fisher Scientific) and oligo dT  
51 primers (125  $\mu$ M) were used to generate cDNA, and expression levels of different genes were assessed  
52 with qPCR using the LightCycler 2.0 Real-Time PCR system (Roche Life Science, Indianapolis, IN). Primer  
53 pairs spanned at least one intron, and they are listed in [Suppl. Table 1](#). The qPCR reaction was performed  
54 with LightCycler 480 SYBR Green I Master (Roche), primers (1  $\mu$ M) and cDNA (equivalent to 5 ng RNA). The  
55 amplification protocol consisted of 5 min 95 °C followed by 45 cycles of 10 sec 95°C, 20 sec 60°C and 20  
56 sec 72°C. Data was analyzed using *LinRegPCR*.<sup>9</sup> We used two reference genes per experiment based on  
57 literature to normalize gene expression (*Hprt*, *Ppia*, *Rpl4* and *Rpl32*).<sup>5</sup>

#### 58 **Cell culture and Luciferase assay**

59 Primers were designed for selected AF variants to amplify fragments of 400\_900 bp (For primers, see [Suppl.](#)  
60 [Table 1](#)) on DNA heterozygous for the selected variant. The pGL2-Promoter Vector (Promega, Madison,  
61 WI) was linearized with XcmI (New England Biolabs, Ipswich, MA) to create a T-overhang and agarose-gel  
62 isolated. PCR products containing both alleles of the selected variants were ligated using TA-cloning to the  
63 pGL2-Promoter Vector. Recombinant plasmid DNA was purified with the PureLink Quick Plasmid Miniprep  
64 kit (Thermo Fisher Scientific). Plasmids that were identical except for the different alleles of the variant  
65 were selected using Sanger sequencing.

66 iAM-1 cells were plated at a cell density of  $4 \times 10^4$  cells per  $\text{cm}^2$  and cultured as described<sup>10</sup>. At day 0 of  
67 cardiomyogenic differentiation, 500 ng pGL2-Promoter Vector DNA as well as 25 ng pRL-TK Renilla vector

68 (Promega) as normalization control was transfected into the cells *in triplo* in a 24-well plate using  
69 Lipofectamine 3000 (Thermo Fisher Scientific). At day 9 of cardiomyogenic differentiation the cells were  
70 harvested. Luciferase measurements were performed on a Promega Turner Biosystems Modulus  
71 Multimode Reader luminometer.

72

## Supplementary Note 1

Description of Supplementary Datasets and programs (Galaxy, Excel) used to produce results in manuscript “Identification of atrial fibrillation associated genes and functional non-coding variants”.

| Supplementary data file | title                                                      | publication                                                                                                                                                                                                                                                                                                                                                 |
|-------------------------|------------------------------------------------------------|-------------------------------------------------------------------------------------------------------------------------------------------------------------------------------------------------------------------------------------------------------------------------------------------------------------------------------------------------------------|
| 8                       | lead SNPs                                                  | Roselli, C. <i>et al.</i> Multi-ethnic genome-wide association study for atrial fibrillation. (2018).                                                                                                                                                                                                                                                       |
| 9                       | Hi-C data (TADs)                                           | <a href="http://promoter.bx.psu.edu/hi-c/view.php">http://promoter.bx.psu.edu/hi-c/view.php</a>                                                                                                                                                                                                                                                             |
| 10                      | Variant regions: AF GWAS SNPs $p < 10^{-6}$                | Roselli, C. <i>et al.</i> Multi-ethnic genome-wide association study for atrial fibrillation. (2018).                                                                                                                                                                                                                                                       |
| 11                      | AF GWAS SNPs $p < 10^{-4}$                                 | Roselli, C. <i>et al.</i> Multi-ethnic genome-wide association study for atrial fibrillation. (2018).                                                                                                                                                                                                                                                       |
| 12                      | SNPs $p < 0.05$ within variant regions                     | Subthreshold SNPs (Supplementary Data file 11) within variant regions (coordinates of Supplementary Data file 10)                                                                                                                                                                                                                                           |
| 13                      | Genome-wide PChi-C                                         | Montefiori, L. E. <i>et al.</i> A promoter interaction map for cardiovascular disease genetics. <i>bioRxiv</i> 340869 (2018).<br>Doi:10.1101/340869                                                                                                                                                                                                         |
| 14                      | Promoters contacted by the variant regions                 | Joining of Supplementary Data file 10 “Variant regions: AF GWAS SNPs $p < 10^{-6}$ ” and Supplementary Data file 13                                                                                                                                                                                                                                         |
| 2                       | Human adult and fetal left and right atrial RNA-seqs       | GSE127856<br><a href="https://www.ncbi.nlm.nih.gov/geo/query/acc.cgi?acc=GSE127856">https://www.ncbi.nlm.nih.gov/geo/query/acc.cgi?acc=GSE127856</a><br>accessible with token: <a href="https://www.ncbi.nlm.nih.gov/geo/query/acc.cgi?acc=GSE127856">olifvwcorbqbxch</a>                                                                                   |
| 14                      | Normalized RNA-seq and PChi-C                              | Joining of Supplementary Data file 7 and Suppl Table 2. Normalized to <i>RPL32</i> , <i>RPL4</i> and <i>H2AF2</i> .                                                                                                                                                                                                                                         |
| 15                      | Genome-wide ATAC-seq peaks                                 | Unpublished data Zhang, and Hill et al., 2019                                                                                                                                                                                                                                                                                                               |
| 4                       | Genome-wide EMERGE peaks                                   | Van Duijvenboden, K., De Boer, B. A., Capon, N., Ruijter, J. M. & Christoffels, V. M. EMERGE: A flexible modelling framework to predict genomic regulatory elements from genomic signatures. <i>Nucleic Acids Res.</i> <b>44</b> , (2015).<br>New training of EMERGE in this manuscript, see Supplementary Table 3 for list of newly incorporated datasets. |
|                         |                                                            |                                                                                                                                                                                                                                                                                                                                                             |
|                         | <b>Program used</b>                                        |                                                                                                                                                                                                                                                                                                                                                             |
| A                       | Galaxy                                                     | <a href="https://usegalaxy.org/">https://usegalaxy.org/</a> used online, free subscription                                                                                                                                                                                                                                                                  |
| A1                      | general text tools<br>→ join two datasets side by side     | Used to merge 2 datasets on a specific field (e.g. to extract only the selected genes of interest from RNA-seq datasets, and get these values into the same Supplementary Data file with e.g. TAD or PChi-C Supplementary Data file)                                                                                                                        |
| A2                      | Common genomic tools → operate on genomic intervals → join | Used to extract e.g. all SNPs with $p < 10^{-4}$ from a Supplementary Data file based on their coordinates falling within the coordinates of a variant region.                                                                                                                                                                                              |



|    |                                            |                                                                                                                                                                                                                                                                                                                                      |
|----|--------------------------------------------|--------------------------------------------------------------------------------------------------------------------------------------------------------------------------------------------------------------------------------------------------------------------------------------------------------------------------------------|
|    | the intervals of two datasets side-by-side |                                                                                                                                                                                                                                                                                                                                      |
| A3 | general text tools<br>→ group              | Used to perform count and sum operations on datasets. E.g. to count the number of times a certain interaction with a specific gene was found in PChi-C dataset, as well as the added value of interaction strength (interaction of the variant region with gene X was found 12 times with a cumulative interaction strength of 20.5) |

### Target gene score calculation:

- Using Supplementary Data file 8 “lead SNPs”, we selected the Topologically Associated Domains (TADs) that these variants were in (using <http://promoter.bx.psu.edu/hi-c/view.php>); resulting in Supplementary Data file 9 “Hi-C data (TADs)” containing coordinates of relevant TADs.
- Using Supplementary Data file 8 “lead SNPs”, we determined the potential functional range of 1 Mb up- and downstream of these lead SNPs by simply adding and subtracting 1 Mb to the SNP coordinate (taking into account start and end of the chromosome).
- Using Supplementary Data file 10 “Variant regions: AF GWAS SNPs  $p < 10^{-6}$ ” we determined the variant regions, defined as the first to last variant with  $p < 10^{-6}$  in LD with the lead SNPs. To extract the subthreshold variants per variant region, we used function A2 of Galaxy to find only the “AF GWAS SNPs  $p < 10^{-4}$ ” out of Supplementary Data file 11 that lie within the variant regions. Resulting in Supplementary Data file 12 “SNPs  $p < 10^{-4}$  within variant regions”
- Using coordinates of Supplementary Data file 10 “Variant regions: AF GWAS SNPs  $p < 10^{-6}$ ” and Supplementary Data file 13 “Genome-wide PChi-C”, we extracted only the promoters of genes contacted by the variant regions (using Galaxy function A2). This Supplementary Data file we summarized using Galaxy function A3 to indicate per gene in contact with the variant region 1) the added interaction strength and 2) the number of interactions with that promoter (Variant region PChi-C interactions).
- Using coordinates of 1 Mb up- and downstream of lead SNP Supplementary Data file 8, we extracted all potential target genes from Supplementary Data file 2 “Human adult and fetal left and right atrial RNA-seqs”.
- To be able to compare between datasets, we merged Supplementary Data file 2 “Human adult and fetal left and right atrial RNA-seqs” and “Variant region PChi-C interactions” and normalized expression using reference genes *RPL32*, *RPL4* and *H2AF2*. This culminated in Supplementary Data file 14 “Normalized RNA-seq and PChi-C”. Using this file we converted the tags to a categorized score of “No expression (0)”, “Expression (1)” and “High expression (2)” based on normalized expression (Supplementary Figure 4) (using excel):

| Dataset        | Low Expression (0) | Expression (1) | High expression (2) |
|----------------|--------------------|----------------|---------------------|
| RNA-seq LA-PCM | 0 < > 10 tags      | 10 < > 40 tags | > 40 tags           |
| RNA-seq LA     | 0 < > 4 tags       | 4 < > 20 tags  | > 20 tags           |
| RNA-seq RA     | 0 < > 3 tags       | 3 < > 20 tags  | > 20 tags           |

|                  |           |           |         |
|------------------|-----------|-----------|---------|
| RNA-seq RA fetal | 0<>3 tags | 3<>8 tags | >8 tags |
| RNA-seq LA fetal | 0<>3 tags | 3<>8 tags | >8 tags |
| PChI-C           | 0<>0 tags | >0 tags   | -       |

- Using Galaxy function A1 and A2 we merged Supplementary Data file 8 “lead SNPs”, Supplementary Data file 9 “Hi-C data (TADs)”, Supplementary Data file 14 “Normalized RNA-seq and PChI-C”. Moreover we manually added the genes that have been implicated in eQTLs in excel. This culminated in Supplementary Data file 2 “Target gene scoring table (TAD, PChI-C, RNA-seqs and eQTL)”.

### Identification of cardiac REs and variant REs:

- Using Galaxy function A2 and coordinates of variant regions from Supplementary Data file 10 “Variant regions: AF GWAS SNPs  $p < 10^{-6}$ ” we extracted ATAC-seq peaks from genome-wide ATAC-seq peak calling resulting in Supplementary Data file 15 “Genome-wide ATAC-seq peaks” that lie within the variant regions Supplementary Data file 3.
- Using Galaxy function A2 and coordinates of variant regions of Supplementary Data file 10 “Variant regions: AF GWAS SNPs  $p < 10^{-6}$ ” we extracted EMERGE peaks from Supplementary Data file “Genome-wide EMERGE peaks” that lie within the variant regions resulting in Supplementary Data file 4.
- Again using Galaxy function A2, we merged Supplementary Data file 12 “SNPs  $p < 10^{-4}$  within variant regions” with Supplementary Data file 15 “Genome-wide ATAC-seq peaks” and Genome-wide EMERGE peaks to get Supplementary Data file 5 “Variants within ATAC-seq or EMERGE peak calling”. These are the potential regulatory potential altering variants.
- To obtain the variants that are potentially altering expression of specific AF target genes, we merged the following files (using Galaxy function A1 and A2): Supplementary Data file 12 “SNPs  $p < 10^{-4}$  within variant regions”, and Supplementary Data file 14 “Promoters contacted by the variant regions”, Supplementary Data file 5 “Variants within ATAC-seq or EMERGE peak calling” and Supplementary Data file 1 “Target gene scoring table (TAD, PChI-C, RNA-seqs and eQTL)”. This resulted in Supplementary Data file 6 “Potential variant enhancers and their target genes”. In this Supplementary Data file all SNPs that lie in potential regulatory regions (ATAC+EMERGE) and their potential target genes (PChI-C) with AF target gene score (above score 11) are summarized.

## Supplementary References

1. Bergmann, O. & Jovinge, S. Isolation of Cardiomyocyte Nuclei from Post-mortem Tissue. *J. Vis. Exp.* 4–9 (2012). doi:10.3791/4205
2. Dobin, A. *et al.* STAR: Ultrafast universal RNA-seq aligner. *Bioinformatics* (2013). doi:10.1093/bioinformatics/bts635
3. Love, M. I., Huber, W. & Anders, S. Moderated estimation of fold change and dispersion for RNA-seq data with DESeq2. *Genome Biol.* (2014). doi:10.1186/s13059-014-0550-8
4. Huang, D. W., Sherman, B. T. & Lempicki, R. A. Systematic and integrative analysis of large gene lists using DAVID bioinformatics resources. *Nat. Protoc.* (2009). doi:10.1038/nprot.2008.211
5. Ruiz-Villalba, A. *et al.* Reference genes for gene expression studies in the mouse heart. *Sci. Rep.* (2017). doi:10.1038/s41598-017-00043-9
6. Heinz, S. *et al.* Simple Combinations of Lineage-Determining Transcription Factors Prime cis-Regulatory Elements Required for Macrophage and B Cell Identities. *Mol. Cell* (2010). doi:10.1016/j.molcel.2010.05.004
7. Visel, A., Minovitsky, S., Dubchak, I. & Pennacchio, L. A. VISTA Enhancer Browser - A database of tissue-specific human enhancers. *Nucleic Acids Res.* **35**, 88–92 (2007).
8. Wei, Z., Zhang, W., Fang, H., Li, Y. & Wang, X. esATAC: an easy-to-use systematic pipeline for ATAC-seq data analysis. *Bioinformatics* (2018). doi:10.1093/bioinformatics/bty141
9. Ruijter, J. M. *et al.* Amplification efficiency: Linking baseline and bias in the analysis of quantitative PCR data. *Nucleic Acids Res.* (2009). doi:10.1093/nar/gkp045

10. Liu, J. *et al.* Generation and primary characterization of iAM-1, a versatile new line of conditionally immortalized atrial myocytes with preserved cardiomyogenic differentiation capacity. *Cardiovasc. Res.* 1–12 (2018). doi:10.1093/cvr/cvy134
